# Supplementary material for: Mono- and binuclear palladacycles via regioselective C–H bond activation: syntheses, mechanistic insights and catalytic activity in direct arylation of azoles
Source: Royal Society of Chemistry journal article supplement (doi:10.1039/c5ra18289a), 2015-01-01
Supplement: c5ra18289a1.pdf [file c5ra18289a1.pdf]

## Supporting information

# Mono- and binuclear palladacycles via regioselective C–H bond activation: syntheses, mechanistic insights and catalytic activity in direct arylation of azoles

Dilip K. Pandey,<sup>a</sup> Shrikant M. Khake,<sup>a</sup> Rajesh G. Gonnade,<sup>b</sup> and Benudhar Punji<sup>\*a</sup>

<sup>a</sup>*Organometallic Synthesis and Catalysis Group, Chemical Engineering Division, CSIR–National Chemical Laboratory (CSIR–NCL), Dr. Homi Bhabha Road, Pune – 411 008, Maharashtra, INDIA. Phone: + 91-20-2590 2733, Fax: + 91-20-2590 2621, E-mail: [b.punji@ncl.res.in](mailto:b.punji@ncl.res.in)*

<sup>b</sup>*Centre for Material Characterization, CSIR–National Chemical Laboratory (CSIR–NCL), Dr. Homi Bhabha Road, Pune – 411 008, Maharashtra, INDIA*

## Contents

|                                                                                            | Page # |
|--------------------------------------------------------------------------------------------|--------|
| 1. Kinetic measurements for palladation reactions                                          | S2     |
| 2. Scope for the arylation of azoles catalyzed by <b>4c</b>                                | S5     |
| 3. Crystal data and structure refinement for complexes                                     | S7     |
| 4. <sup>1</sup> H, <sup>13</sup> C and <sup>31</sup> P NMR spectra of ligands <b>1a-1b</b> | S9     |
| 5. <sup>1</sup> H, <sup>13</sup> C, <sup>31</sup> P NMR and mass spectra of complexes      | S12    |
| 6. 2D NMR spectra of complex <b>2b</b> and <b>4b</b>                                       | S28    |
| 7. <sup>1</sup> H, <sup>13</sup> C and <sup>31</sup> P NMR and mass spectra of <b>8c</b>   | S30    |
| 8. Bond lengths and bond angles for complexes                                              | S32    |

## 1. Kinetic measurements for palladation reactions

*Rate order determination:* The rate order of palladation reaction for each base was determined by the initial rate method. The data of the concentration of the product vs time (min) plot was fitted linear with OriginPro 8. The slope of the linear fitting represents the reaction rate. The order of the reaction was then determined by plotting the log(rate) vs log(conc. of base), wherein the slope indicates the order of reaction.

*Rate order determination for K<sub>3</sub>PO<sub>4</sub> (Fig S1):* To determine the order of the palladation reaction on K<sub>3</sub>PO<sub>4</sub>, the initial rates at different initial concentrations (1 equiv, 3 equiv, 10 equiv) of K<sub>3</sub>PO<sub>4</sub> were recorded. The final data was obtained by averaging the results of two independent measurements.

| Experiment | Amount of K <sub>3</sub> PO <sub>4</sub> [equiv] | Initial rate [Mmin <sup>-1</sup> ] x 10 <sup>-3</sup> |
|------------|--------------------------------------------------|-------------------------------------------------------|
| 1          | 0.371 mmol [1.0]                                 | 0.466                                                 |
| 2          | 1.113 mmol [3.0]                                 | 0.302                                                 |
| 3          | 3.71 mmol [10.0]                                 | 0.360                                                 |

*Procedure:* To a 25 mL round-bottom flask equipped with magnetic stir bar was introduced Pd(COD)Cl<sub>2</sub> (0.106 g, 0.371 mmol) and **1c** (0.120 g, 0.371 mmol), and 1,4-dioxane (5.0 mL) was added into it inside the glove-box, which makes 0.0742 M concentration of the reaction mixture. The reaction mixture was then stirred at room temperature for 1 h and 0.5 mL of the reaction mixture was drawn to a NMR tube. The <sup>31</sup>P NMR measurement of the reaction mixture indicated the formation of the species **6c**. To the reaction mixture in the flask, appropriate amount K<sub>3</sub>PO<sub>4</sub> (as shown in table above) was added and the reaction mixture was heated in an oil bath at 70 °C. At regular intervals (5, 10, 15, 20 and 30 min), 0.5 mL of the reaction mixture was drawn to the NMR tube and <sup>31</sup>P NMR analyses were carried out for each sample. The concentration of the product **2c** obtained in each sample was determined from the peak integral percentage of the product with respect to the starting compound **6c**.

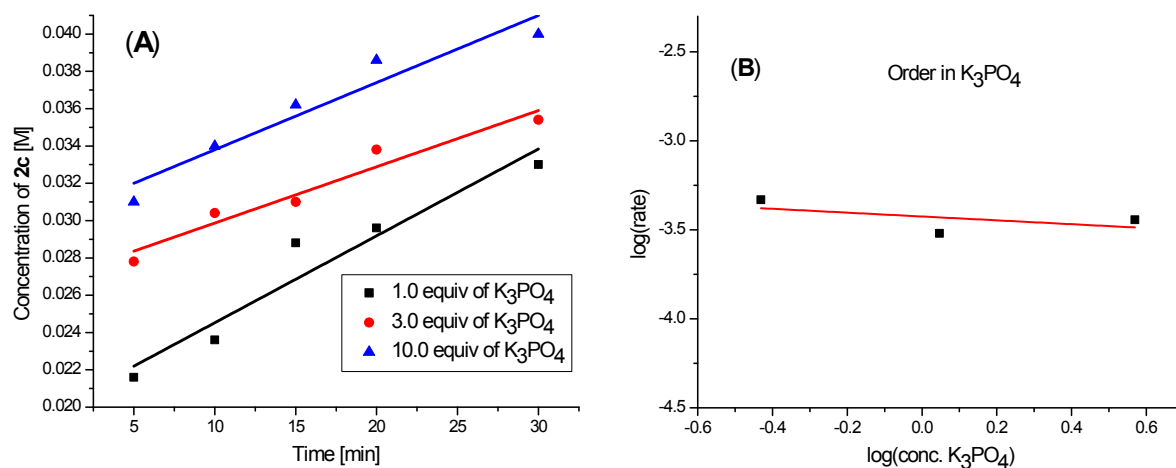

**Fig. S1** (A) Time-dependent yields of the palladacycle **2c** at different initial loading of K<sub>3</sub>PO<sub>4</sub>. (B) Plot of log(rate) vs log(conc. K<sub>3</sub>PO<sub>4</sub>). The rates are average of two independent measurements.

*Rate order determination for Et<sub>3</sub>N (Fig S2):* To determine the order of the palladation reaction on Et<sub>3</sub>N, the initial rates at different initial concentrations (0.074, 0.222, 0.444 and 0.742 [M]) of Et<sub>3</sub>N were recorded. The final data was obtained by averaging the results of two independent measurements.

| Experiment | Conc. of Et <sub>3</sub> N [M] | Initial rate [Mmin <sup>-1</sup> ] x 10 <sup>-3</sup> |
|------------|--------------------------------|-------------------------------------------------------|
| 1          | 0.074                          | 1.14                                                  |
| 2          | 0.222                          | 1.69                                                  |
| 3          | 0.444                          | 0.80                                                  |
| 4          | 0.742                          | 0.702                                                 |

*Procedure:* To a 25 mL round-bottom flask equipped with magnetic stir bar was introduced Pd(COD)Cl<sub>2</sub> (0.106 g, 0.371 mmol) and **1c** (0.120 g, 0.371 mmol), and 1,4-dioxane (5.0 mL) was added into it inside the glove-box, which makes 0.0742 M concentration of the reaction mixture. To the above reaction mixture appropriate amount Et<sub>3</sub>N (as shown in table above) was added and the reaction mixture was stirred at room temperature for 1 h. About 0.5 mL of the reaction mixture was drawn to a NMR tube, whose <sup>31</sup>P NMR measurement indicated the

formation of the species **7c**. The reaction mixture on the flask was then heated in an oil bath at 70 °C. At regular intervals (5, 10, 15 and 20 min), 0.5 mL of the reaction mixture was drawn to the NMR tube and <sup>31</sup>P NMR analyses were carried out for each sample. The concentration of the product **4c** obtained in each sample was determined from the peak integral percentage of the product with respect to the starting compound **7c**.

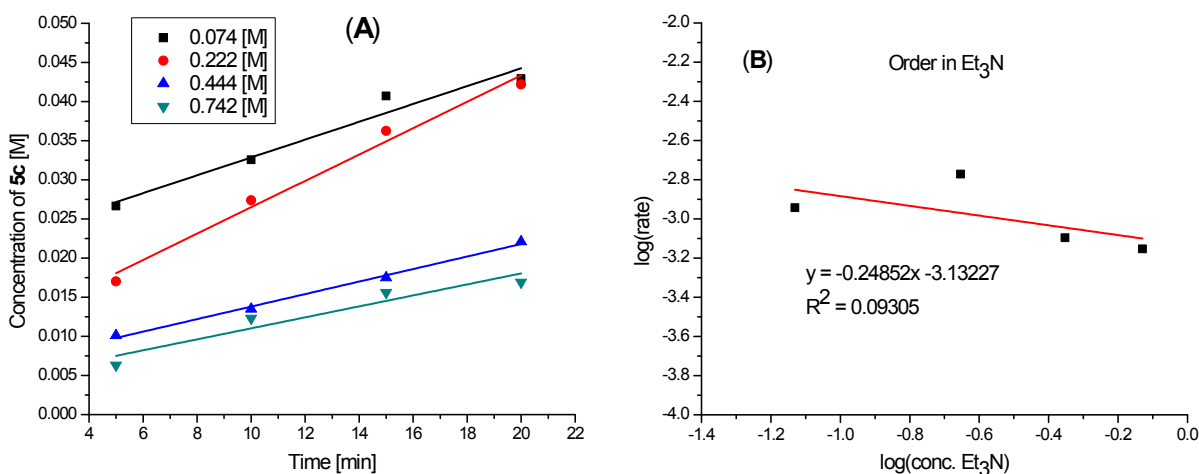

**Fig. S2** (A) Time-dependent yields of the palladacycle **4c** at different initial concentration of Et<sub>3</sub>N. (B) Plot of log(rate) vs log(conc. Et<sub>3</sub>N). The rates are average of two independent measurements.

*Rate order determination for pyridine:* To determine the order of the palladation reaction on pyridine, the initial rates at different initial concentrations (0.074, 0.222, 0.444 and 0.742 [M]) of pyridine were recorded. The final data was obtained by averaging the results of two independent measurements.

| Experiment | Conc. of pyridine [M] | Initial rate [Mmin <sup>-1</sup> ] x 10 <sup>-3</sup> |
|------------|-----------------------|-------------------------------------------------------|
| 1          | 0.074                 | 0.296                                                 |
| 2          | 0.222                 | 0.280                                                 |
| 3          | 0.444                 | 0.135                                                 |
| 4          | 0.742                 | 0.134                                                 |

*Procedure:* To a 25 mL round-bottom flask equipped with magnetic stir bar was introduced Pd(COD)Cl<sub>2</sub> (0.106 g, 0.371 mmol) and **1c** (0.120 g, 0.371 mmol), and 1,4-dioxane (5.0 mL) was added into it inside the glove-box, which makes 0.0742 M concentration of the reaction mixture. To the above reaction mixture appropriate amount pyridine (as shown in table above) was added and the reaction mixture was stirred at room temperature for 1 h. About 0.5 mL of the reaction mixture was drawn to a NMR tube, whose <sup>31</sup>P NMR measurement indicated the formation of the species **8c**. The reaction mixture on the flask was then heated in an oil bath at 70 °C. At regular intervals (5, 10, 15, 20, 30 and 45 min), 0.5 mL of the reaction mixture was drawn to the NMR tube and <sup>31</sup>P NMR analyses were carried out for each sample. The concentration of the product **2c** obtained in each sample was determined from the peak integral percentage of the product with respect to the starting compound **8c**.

## 2. Table S1 Scope for the arylation of azoles catalyzed by **4c<sup>a</sup>**

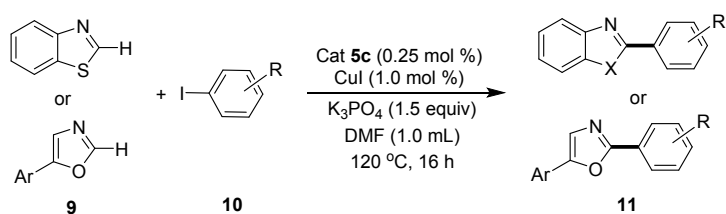

| Entry | Azoles ( <b>9</b> ) | Product ( <b>10</b> ) | Yield (%) <sup>b</sup> |
|-------|---------------------|-----------------------|------------------------|
| 1     |                     |                       | <b>(11aa)</b><br>93    |
| 2     |                     |                       | <b>(11ba)</b><br>64    |
| 3     |                     |                       | <b>(11ca)</b><br>67    |
| 4     |                     |                       | <b>(11da)</b><br>75    |
| 5     |                     |                       | <b>(11ea)</b><br>87    |
| 6     |                     |                       | <b>(11ee)</b><br>81    |

|    |                                                                                     |                                                                                     |                     |           |
|----|-------------------------------------------------------------------------------------|-------------------------------------------------------------------------------------|---------------------|-----------|
|    |    |    |                     |           |
| 7  |                                                                                     |                                                                                     | R = OMe             | (11ab) 96 |
| 8  |                                                                                     |                                                                                     | R = F               | (11ac) 76 |
| 9  |                                                                                     |                                                                                     | R = Cl              | (11ad) 79 |
| 10 |                                                                                     |                                                                                     | R = CF <sub>3</sub> | (11ae) 90 |
| 11 |                                                                                     |                                                                                     | R = CN              | (11af) 86 |
| 12 |                                                                                     |                                                                                     | R = NO <sub>2</sub> | (11ag) 26 |
| 13 |                                                                                     |                                                                                     | R = COOMe           | (11ah) 37 |
|    |    |    |                     |           |
| 14 |                                                                                     |                                                                                     | R = Me              | (11ai) 91 |
| 15 |                                                                                     |                                                                                     | R = OMe             | (11aj) 72 |
| 16 |                                                                                     |                                                                                     | R = Cl              | (11ak) 79 |
| 17 |    |    |                     | (11al) 40 |
| 18 |   |   |                     | (11am) 75 |
| 19 |  |  |                     | (11an) 65 |
| 20 |  |  |                     | (11ao) 97 |
| 21 |  |  |                     | (11ap) 54 |
| 22 |  |  |                     | (11aq) 68 |

<sup>a</sup>Reaction conditions: Azole (0.3 mmol), aryl iodide (0.45 mmol), K<sub>3</sub>PO<sub>4</sub> (0.096 g, 0.45 mmol), catalyst **4c** (0.0007 g, 0.25 mol %), CuI (0.0006 g, 1.0 mol %), DMF (1.0 mL), 120 °C, 16 h.

<sup>b</sup>Yields of isolated compounds.

**3. Table S2** Crystal data and structure refinement for complexes **2a**, **2b** and **3a**

|                                               | <b>2a</b>                                            | <b>2b</b>                                            | <b>3a</b>                                           |
|-----------------------------------------------|------------------------------------------------------|------------------------------------------------------|-----------------------------------------------------|
| Empirical formula                             | C <sub>25</sub> H <sub>29</sub> ClN <sub>3</sub> OPd | C <sub>21</sub> H <sub>39</sub> ClN <sub>3</sub> OPd | C <sub>27</sub> H <sub>32</sub> NO <sub>3</sub> PPd |
| Formula weight                                | 532.31                                               | 522.37                                               | 555.91                                              |
| Temperature (K)                               | 150(2)                                               | 296(2)                                               | 200(2)                                              |
| Crystal system                                | monoclinic                                           | monoclinic                                           | monoclinic                                          |
| Space group                                   | <i>P2<sub>1</sub>/c</i>                              | <i>P2<sub>1</sub>/c</i>                              | <i>P2<sub>1</sub>/c</i>                             |
| <i>a</i> /Å                                   | 16.5228(14)                                          | 7.9316(3)                                            | 10.7002(3)                                          |
| <i>b</i> /Å                                   | 10.2622(9)                                           | 13.8355(5)                                           | 15.0417(4)                                          |
| <i>c</i> /Å                                   | 14.7716(13)                                          | 22.8534(8)                                           | 15.7925(4)                                          |
| $\alpha$ /°                                   | 90                                                   | 90                                                   | 90                                                  |
| $\beta$ /°                                    | 110.312(3)                                           | 98.291(2)                                            | 99.1280(10)                                         |
| $\gamma$ /°                                   | 90                                                   | 90                                                   | 90                                                  |
| <i>V</i> (Å <sup>3</sup> )                    | 2348.9(4)                                            | 2481.67(16)                                          | 2509.60(12)                                         |
| <i>Z</i>                                      | 4                                                    | 4                                                    | 4                                                   |
| $\rho_{\text{calc}}$ , (Mg/m <sup>3</sup> )   | 1.505                                                | 1.398                                                | 1.471                                               |
| $\epsilon$ (mm <sup>-1</sup> )                | 0.989                                                | 0.936                                                | 0.832                                               |
| <i>F</i> (000)                                | 1088                                                 | 1088                                                 | 1144                                                |
| Crystal size (mm)                             | 0.65 x 0.58 x 0.52                                   | 0.67 x 0.22 x 0.16                                   | 0.41 x 0.37 x 0.22                                  |
| $\theta$ (min, max) (°)                       | 2.38 to 25.00                                        | 1.73 to 25.00                                        | 1.88 to 25.00                                       |
| R(int)                                        | 0.0227                                               | 0.0376                                               | 0.0265                                              |
| Independent reflections                       | 4137                                                 | 4372                                                 | 4410                                                |
| Completeness to $\theta$                      | 99.9 %                                               | 100.0 %                                              | 100.0 %                                             |
| Max. and min. transmission                    | 0.6274, 0.5658                                       | 0.8647, 0.5729                                       | 0.8382, 0.7267                                      |
| Data / restraints / parameters                | 4137 / 0 / 275                                       | 4372 / 0 / 261                                       | 4410 / 0 / 303                                      |
| GOF ( <i>F</i> <sup>2</sup> )                 | 1.093                                                | 1.155                                                | 1.027                                               |
| R1, wR2 ( <i>I</i> > 2 $\sigma$ ( <i>I</i> )) | 0.0167, 0.0428                                       | 0.0241, 0.0600                                       | 0.0294, 0.0648                                      |
| R1, wR2 (all data)                            | 0.0170, 0.0430                                       | 0.0256, 0.0613                                       | 0.0317, 0.0660                                      |

**Table S3** Crystal data and structure refinement for complexes **3b** and **5a**

|                                               | <b>3b</b>                                                         | <b>5a</b>                                                                                    |
|-----------------------------------------------|-------------------------------------------------------------------|----------------------------------------------------------------------------------------------|
| Empirical formula                             | C <sub>23</sub> H <sub>42</sub> N <sub>3</sub> O <sub>3</sub> PPd | C <sub>54</sub> H <sub>64</sub> N <sub>2</sub> O <sub>6</sub> P <sub>2</sub> Pd <sub>2</sub> |
| Formula weight                                | 545.97                                                            | 1111.81                                                                                      |
| Temperature (K)                               | 200(2)                                                            | 200(2)                                                                                       |
| Crystal system                                | monoclinic                                                        | monoclinic                                                                                   |
| Space group                                   | <i>P</i> 2 <sub>1</sub> / <i>c</i>                                | <i>P</i> 2 <sub>1</sub> / <i>c</i>                                                           |
| <i>a</i> /Å                                   | 11.5217(7)                                                        | 11.1190(2)                                                                                   |
| <i>b</i> /Å                                   | 12.4022(8)                                                        | 11.0743(3)                                                                                   |
| <i>c</i> /Å                                   | 18.4419(12)                                                       | 21.2441(5)                                                                                   |
| $\alpha$ /°                                   | 90                                                                | 90                                                                                           |
| $\beta$ /°                                    | 101.270(2)                                                        | 99.9410(10)                                                                                  |
| $\gamma$ /°                                   | 90                                                                | 90                                                                                           |
| V (Å <sup>3</sup> )                           | 2584.4(3)                                                         | 2576.62(10)                                                                                  |
| Z                                             | 4                                                                 | 2                                                                                            |
| $\rho_{\text{calc}}$ (Mg/m <sup>3</sup> )     | 1.403                                                             | 1.433                                                                                        |
| $\varepsilon$ (mm <sup>-1</sup> )             | 0.807                                                             | 0.810                                                                                        |
| <i>F</i> (000)                                | 1144                                                              | 1144                                                                                         |
| Crystal size (mm)                             | 0.39 x 0.32 x 0.21                                                | 0.42 x 0.31 x 0.21                                                                           |
| $\theta$ (min, max) (°)                       | 1.80 to 25.00                                                     | 1.84 to 25.00                                                                                |
| R(int)                                        | 0.0202                                                            | 0.0289                                                                                       |
| Independent reflections                       | 4553                                                              | 4483                                                                                         |
| Completeness to $\theta$                      | 100.0 %                                                           | 98.3 %                                                                                       |
| Max. and min. transmission                    | 0.8487, 0.7436                                                    | 0.8483, 0.7272                                                                               |
| Data / restraints / parameters                | 4553 / 0 / 289                                                    | 4483 / 0 / 303                                                                               |
| GOF ( <i>F</i> <sup>2</sup> )                 | 1.160                                                             | 1.000                                                                                        |
| R1, wR2 ( <i>I</i> > 2 $\sigma$ ( <i>I</i> )) | 0.0204, 0.0541                                                    | 0.0452, 0.0744                                                                               |
| R1, wR2 (all data)                            | 0.0220, 0.0558                                                    | 0.0620, 0.0805                                                                               |



#### 4. NMR spectra of ligands **1a** and **1b**

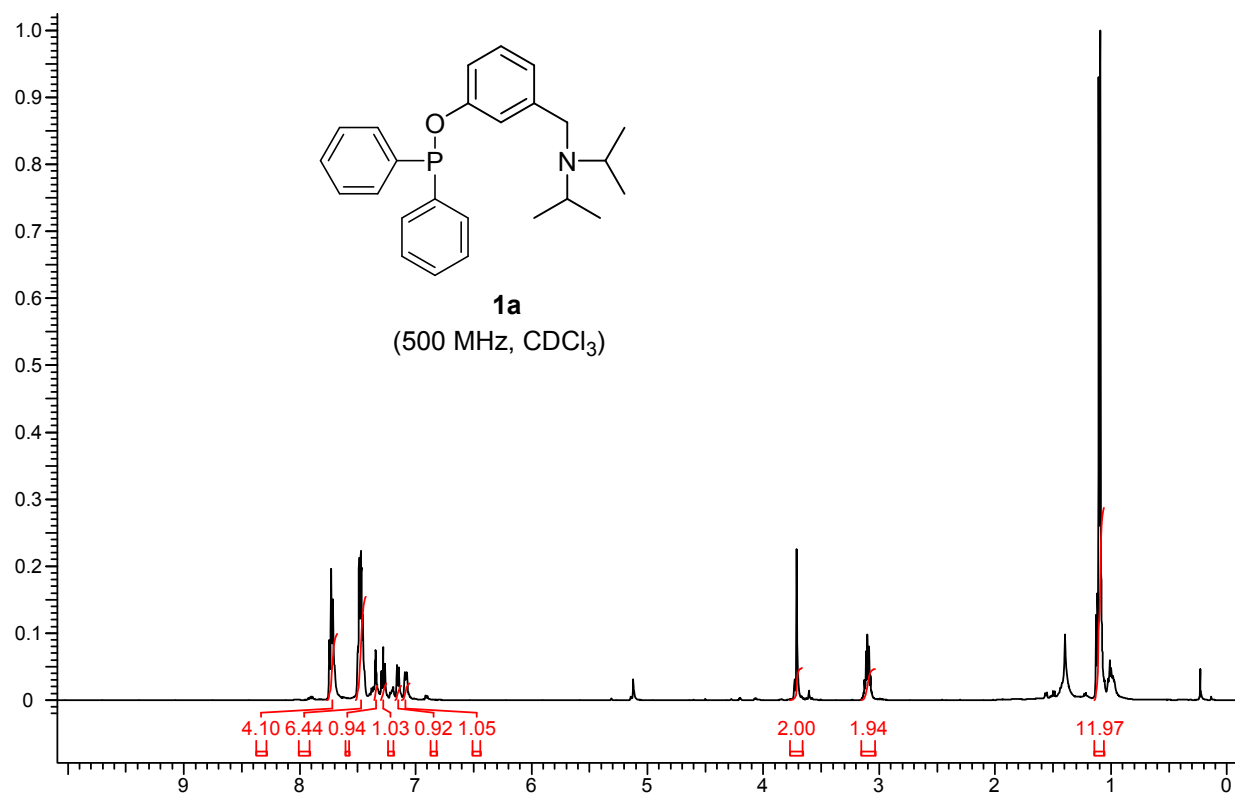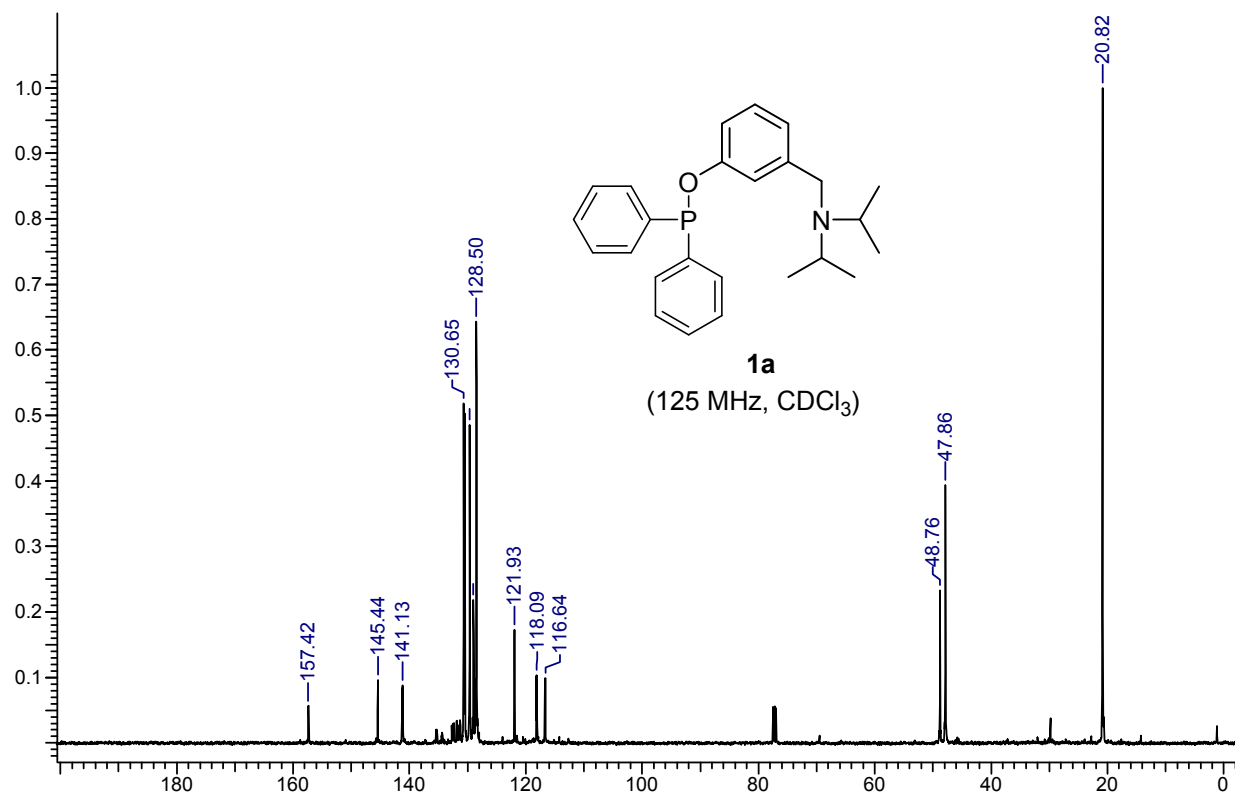

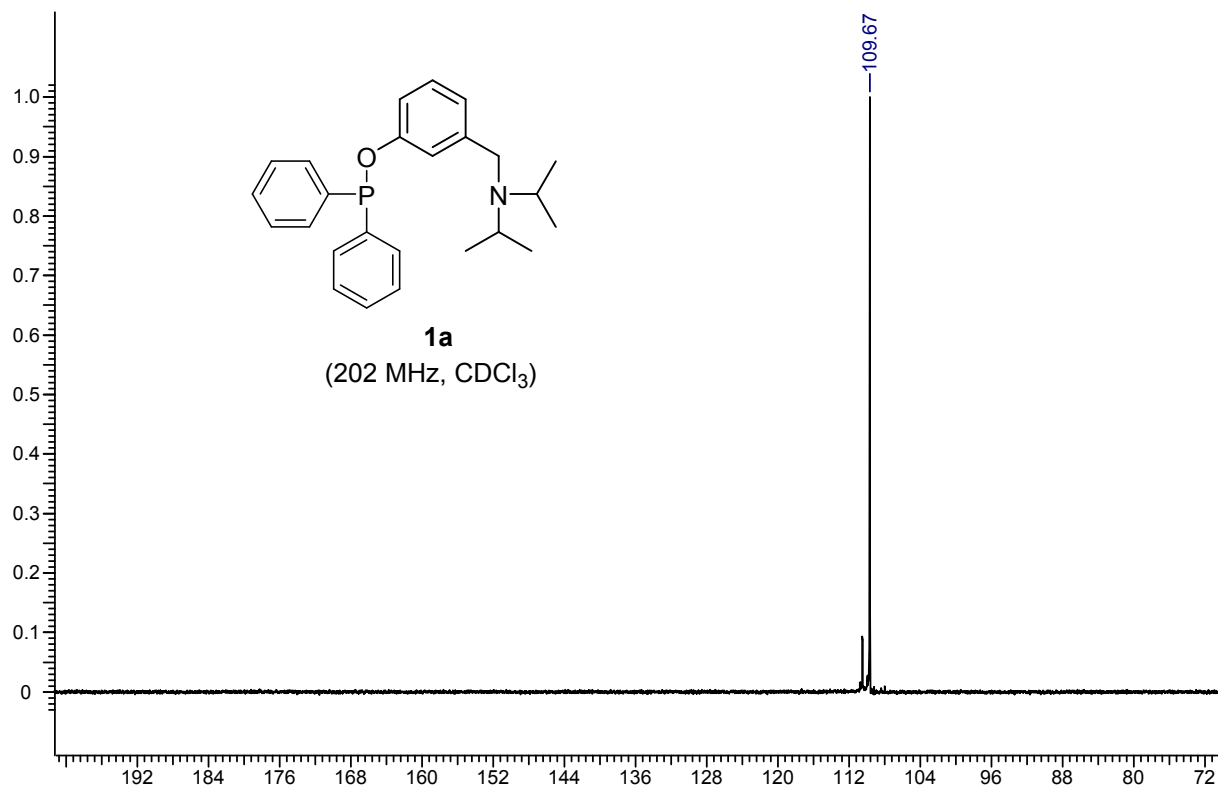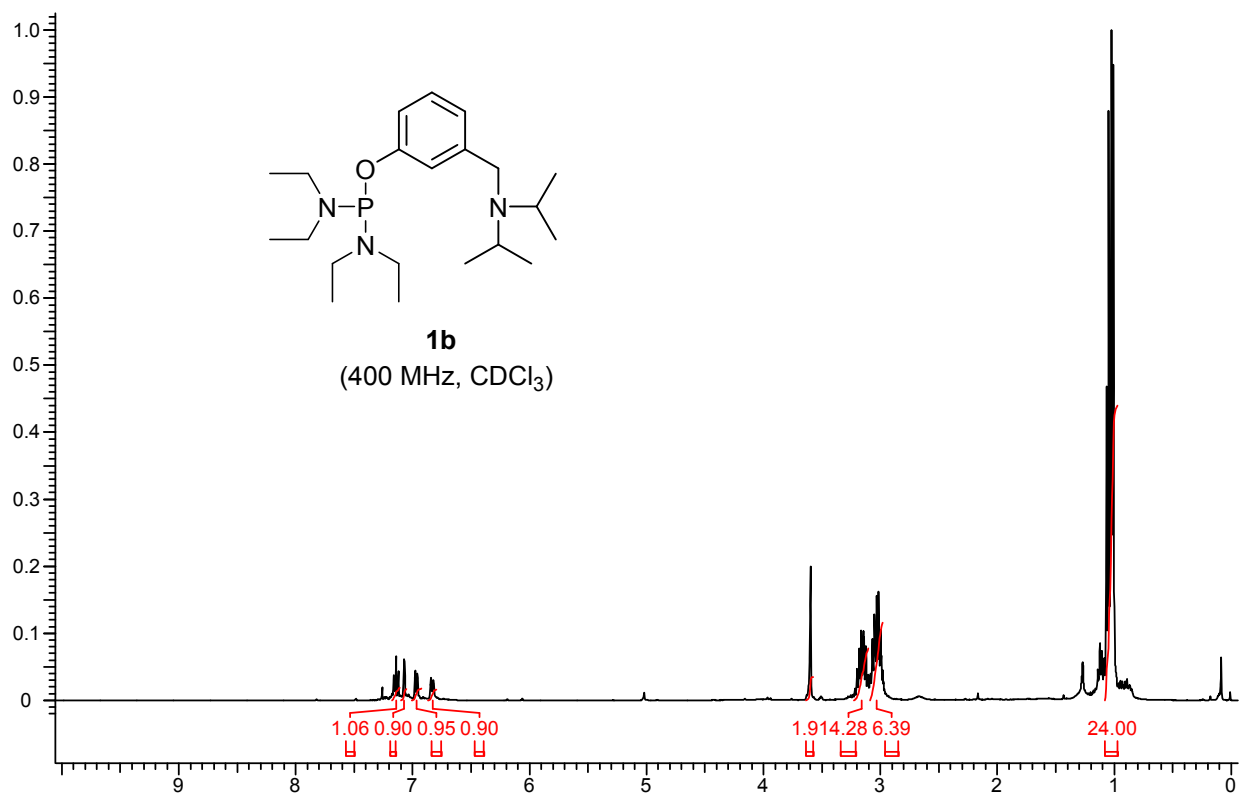

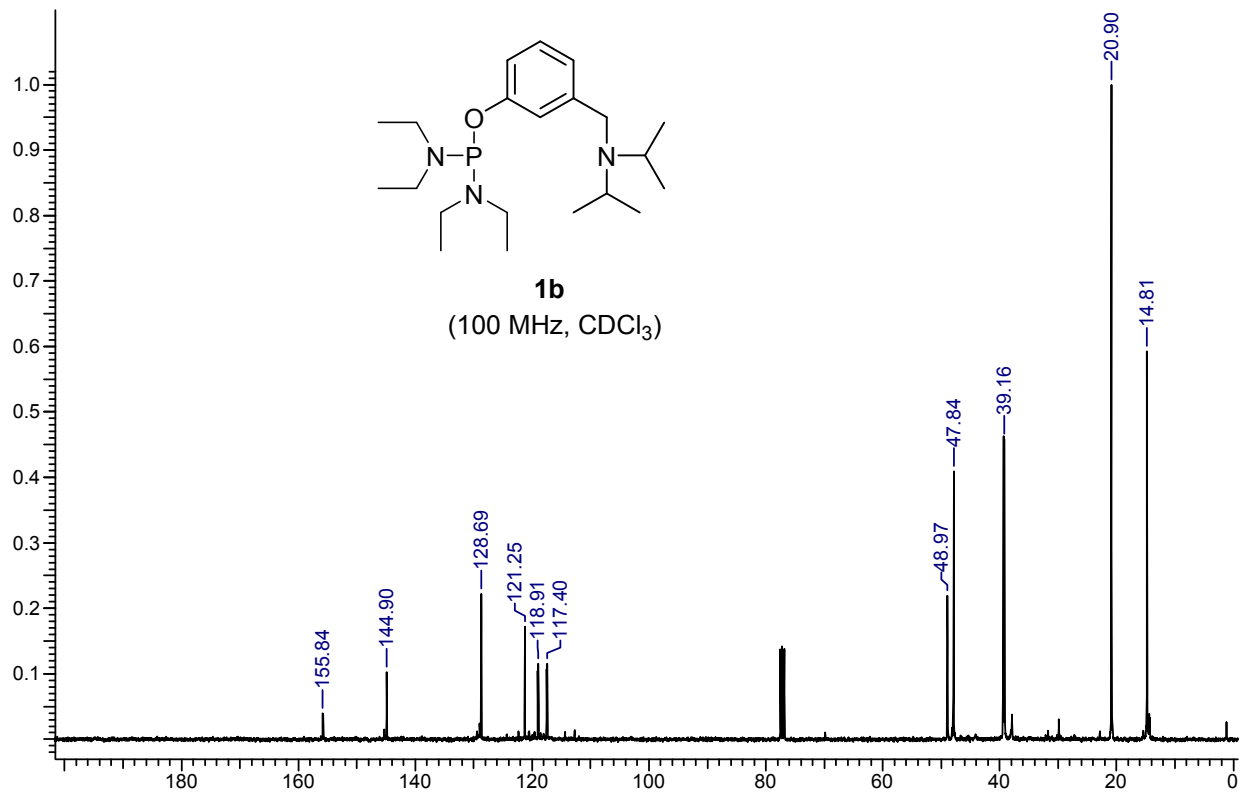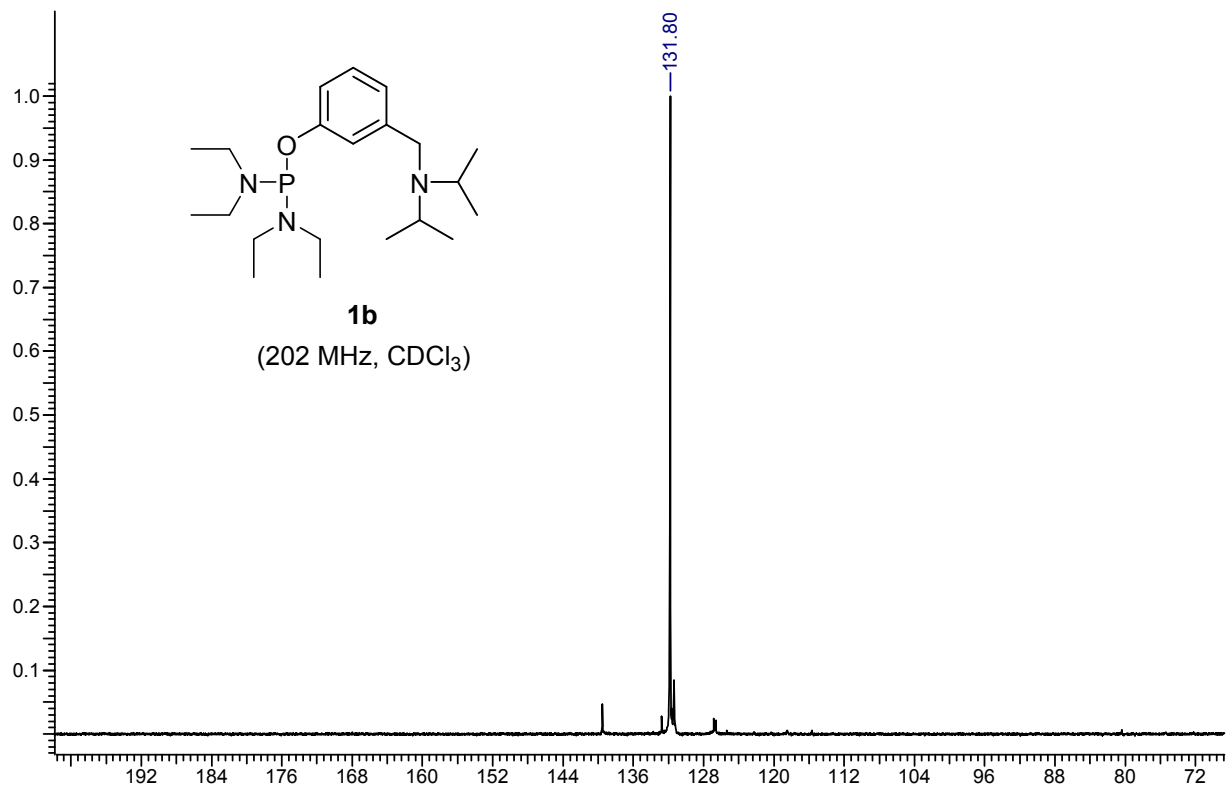

## 5. NMR and mass spectra of complexes

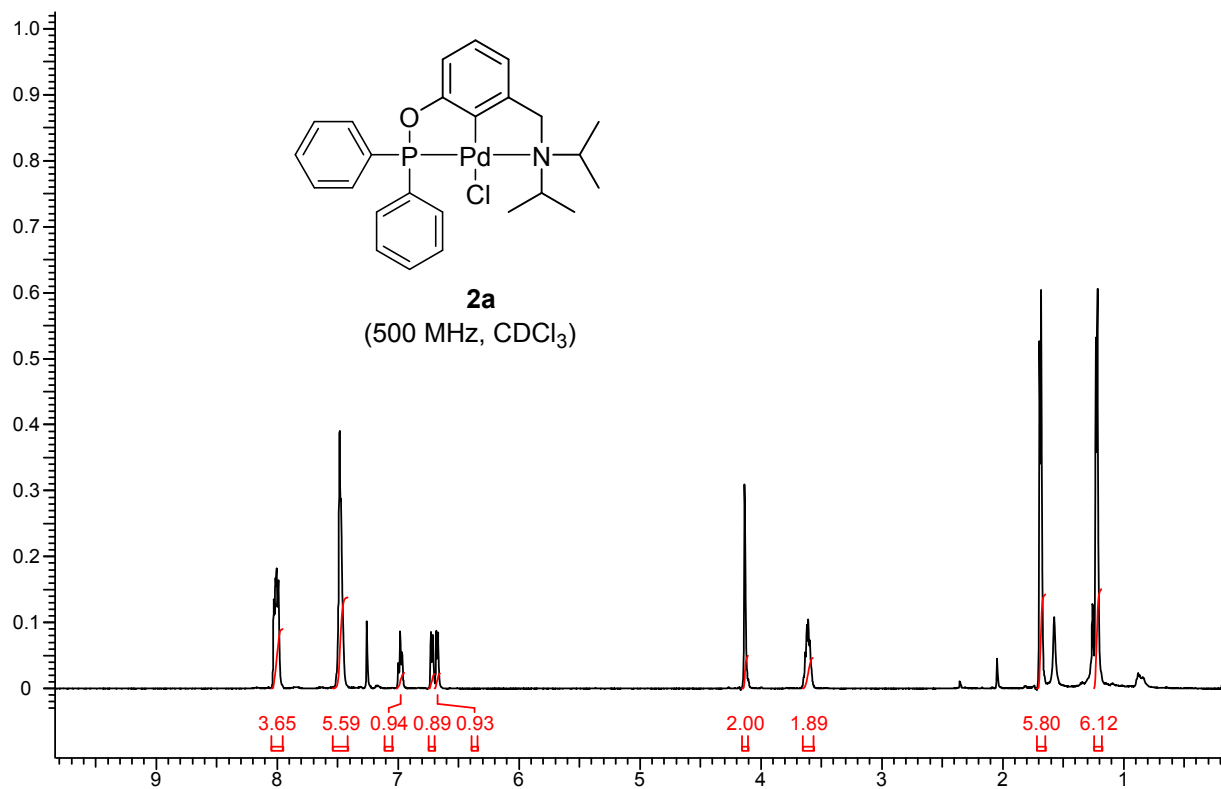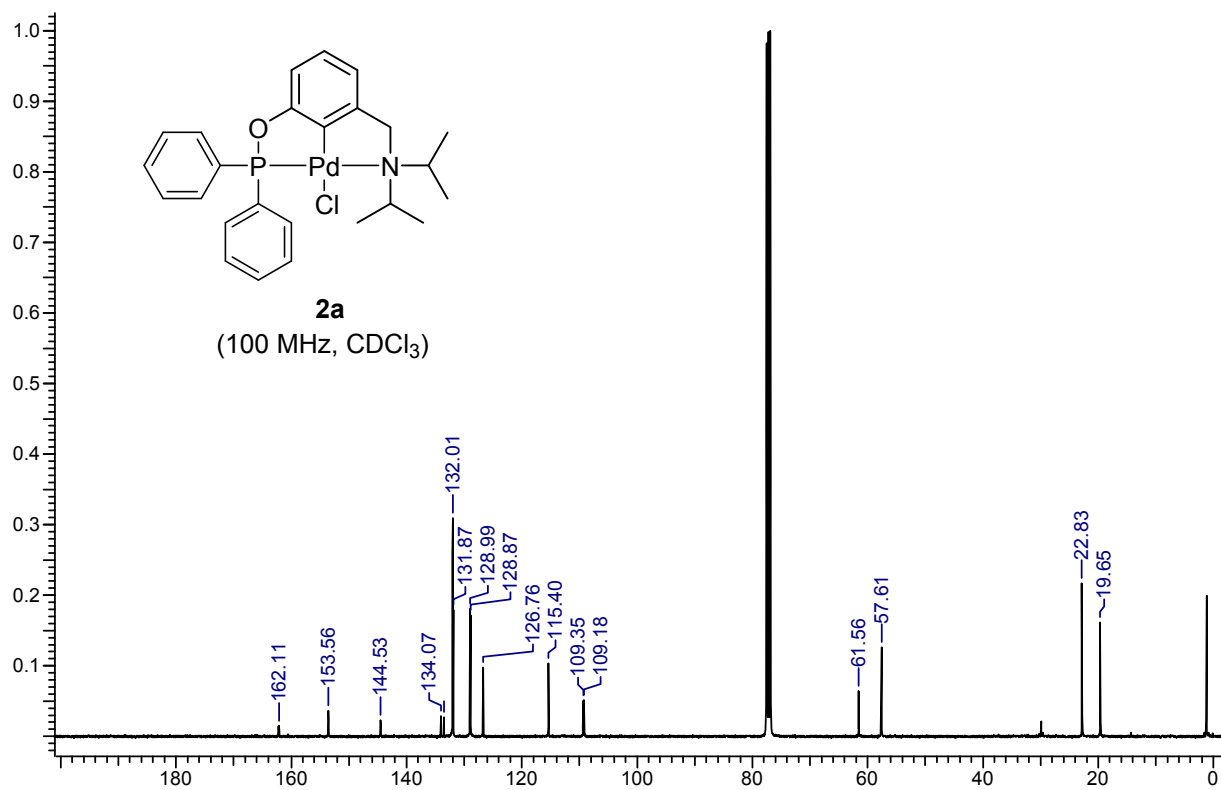

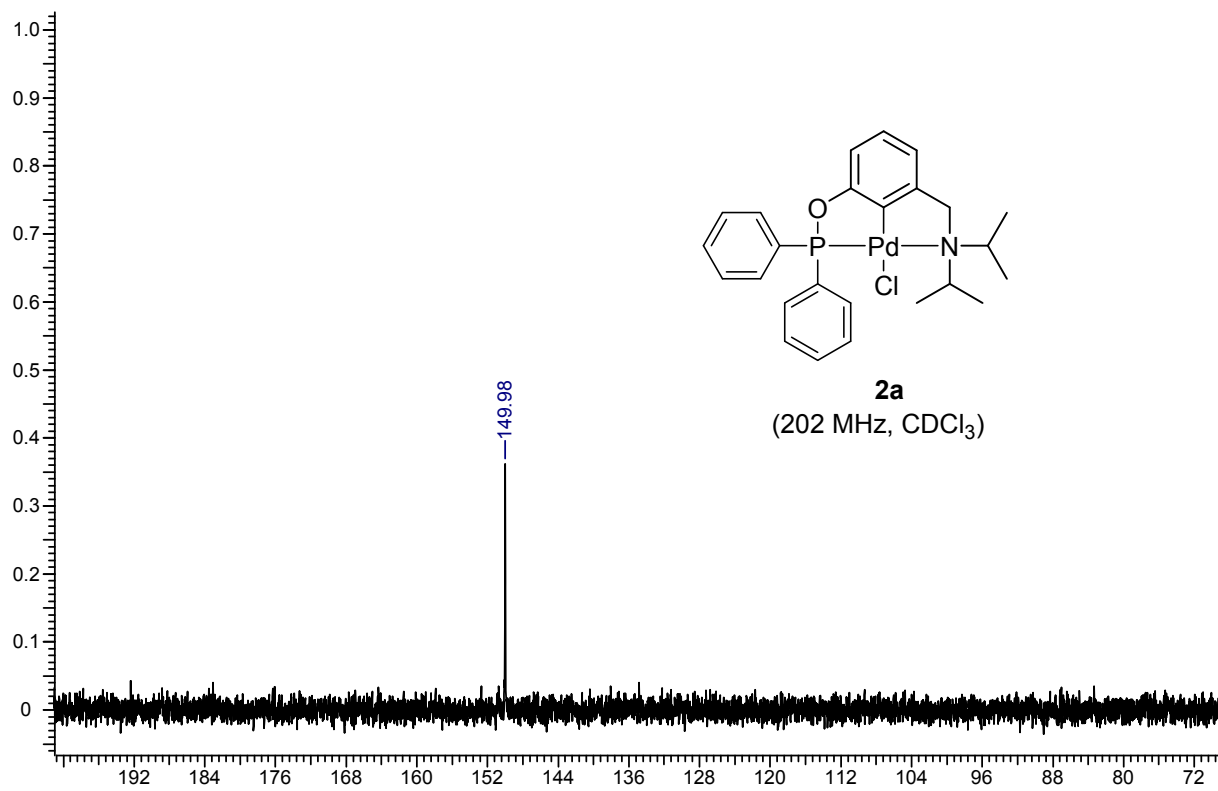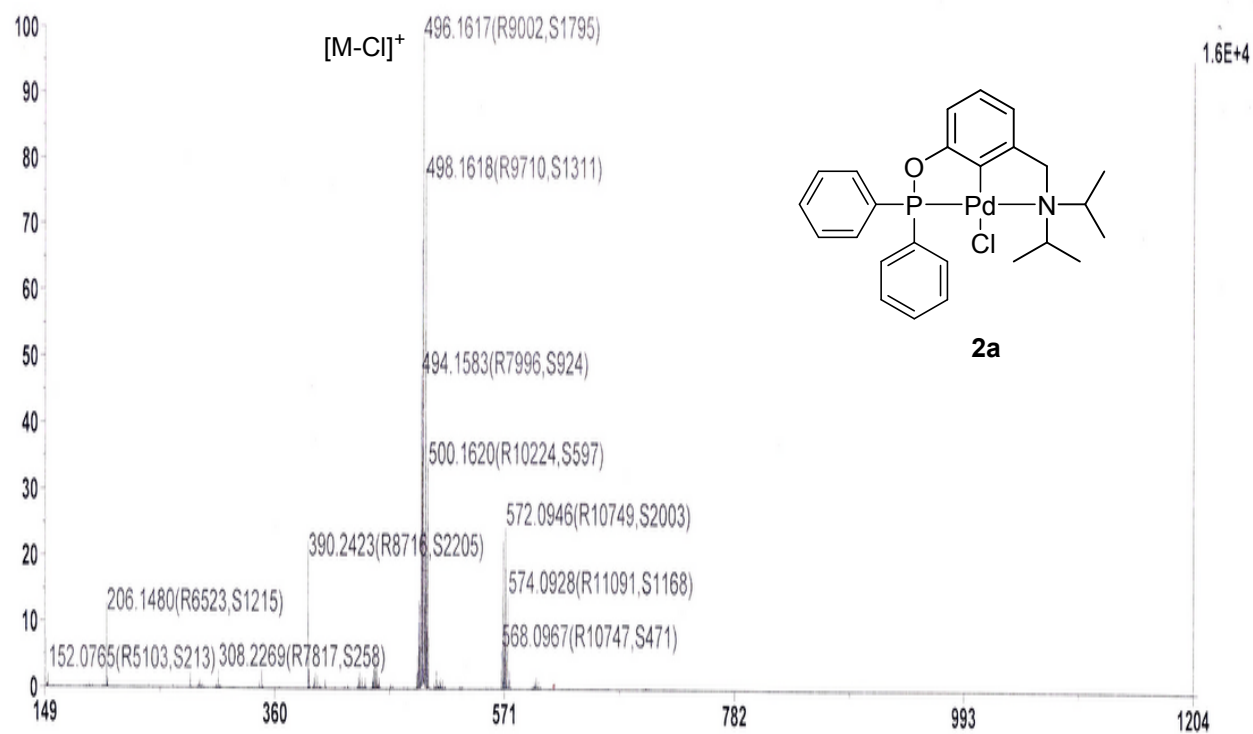

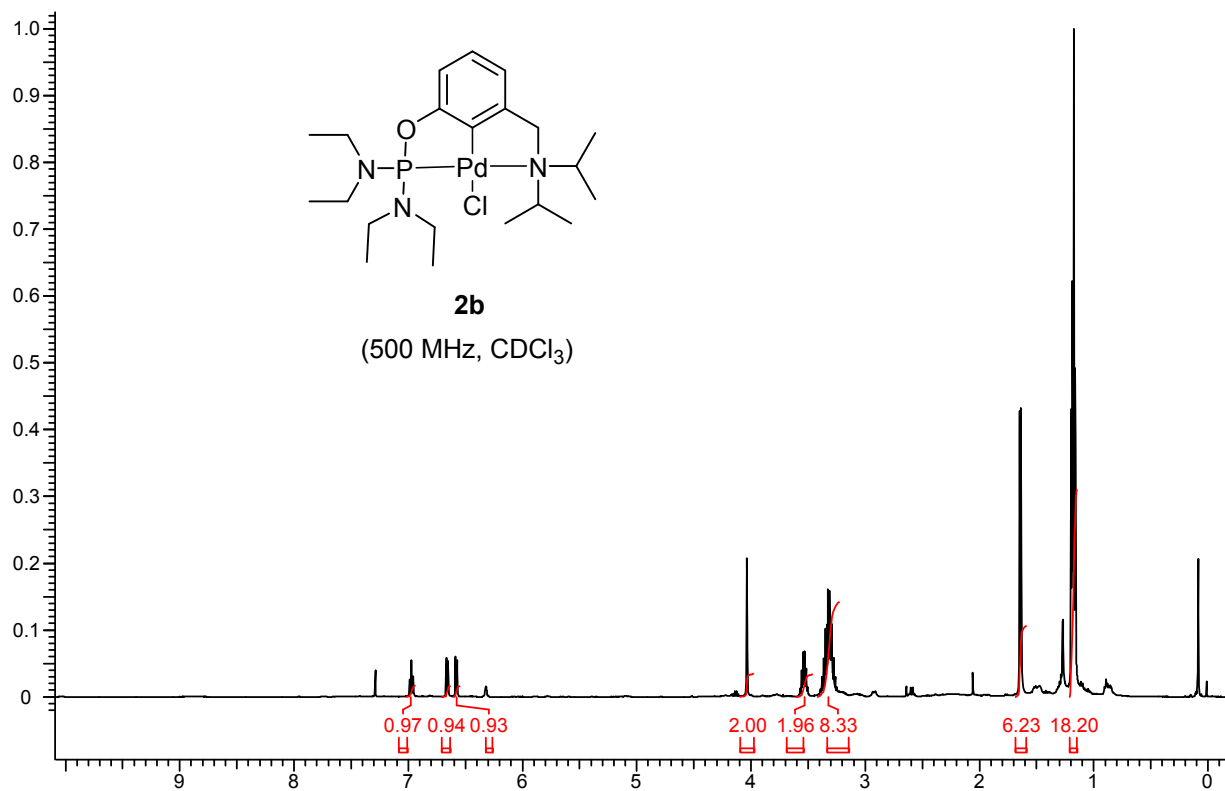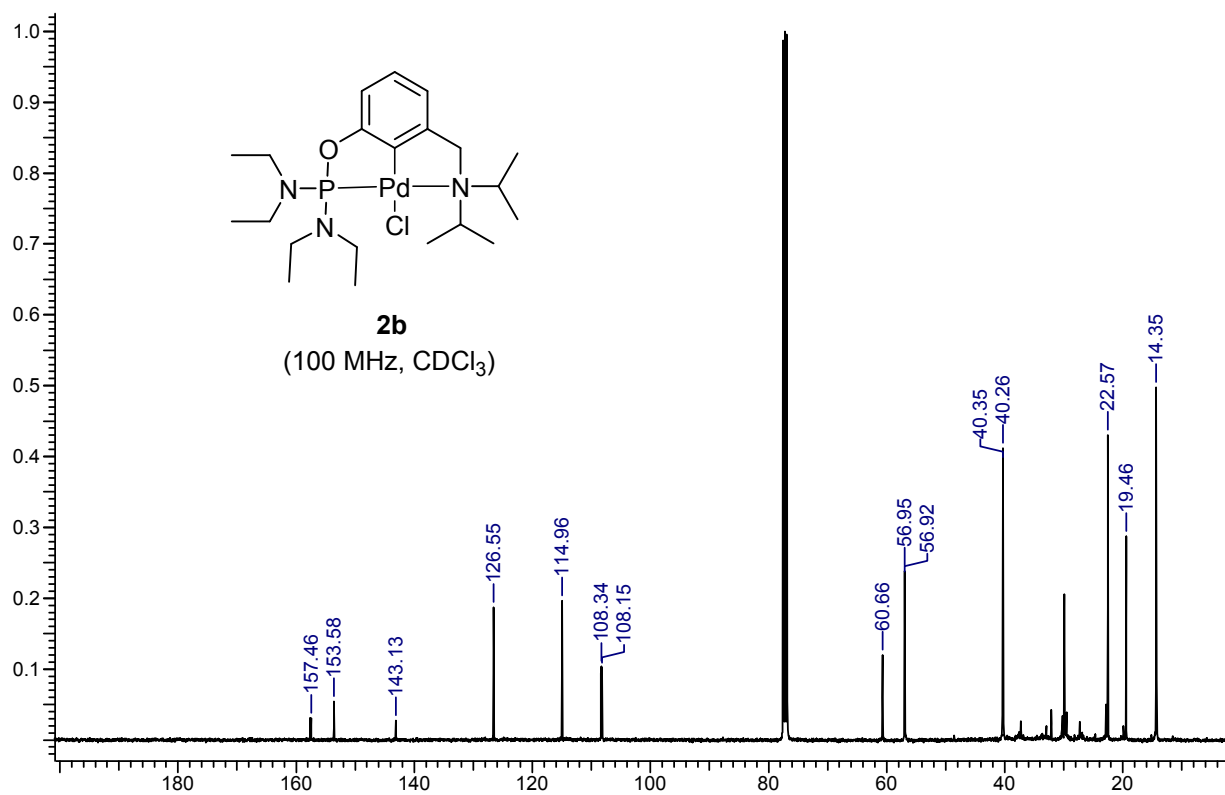

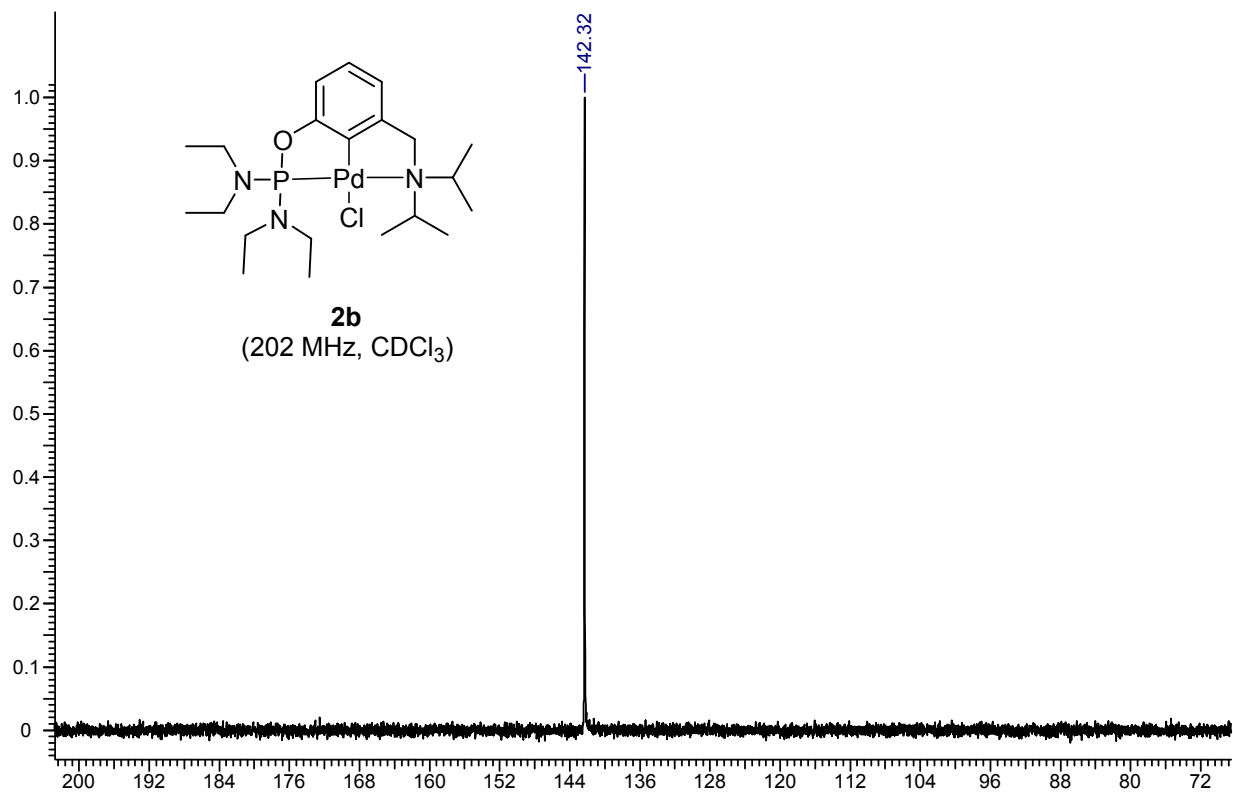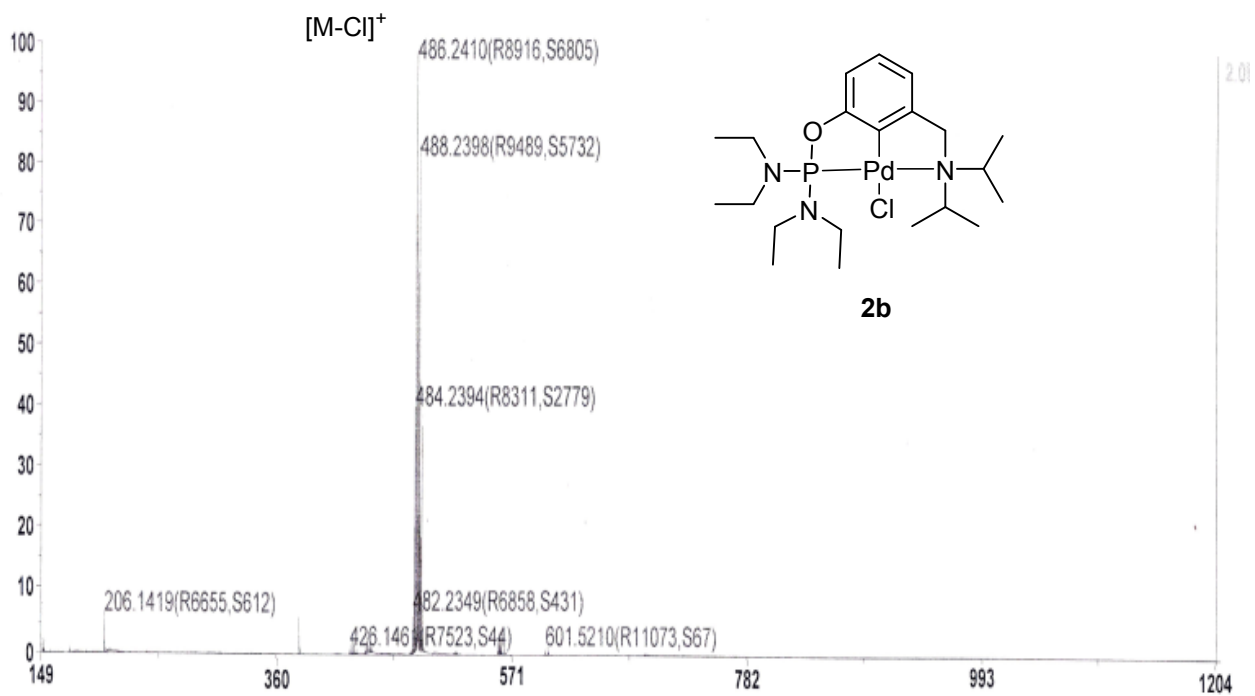

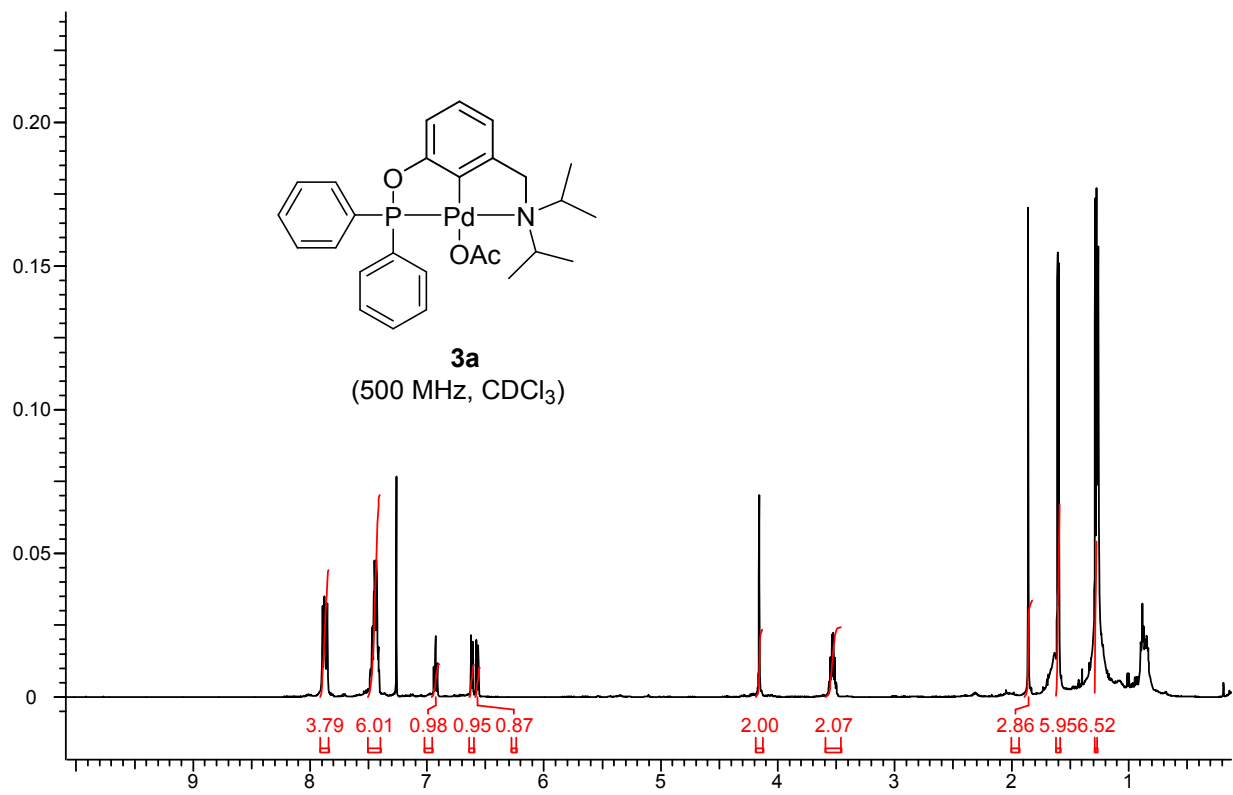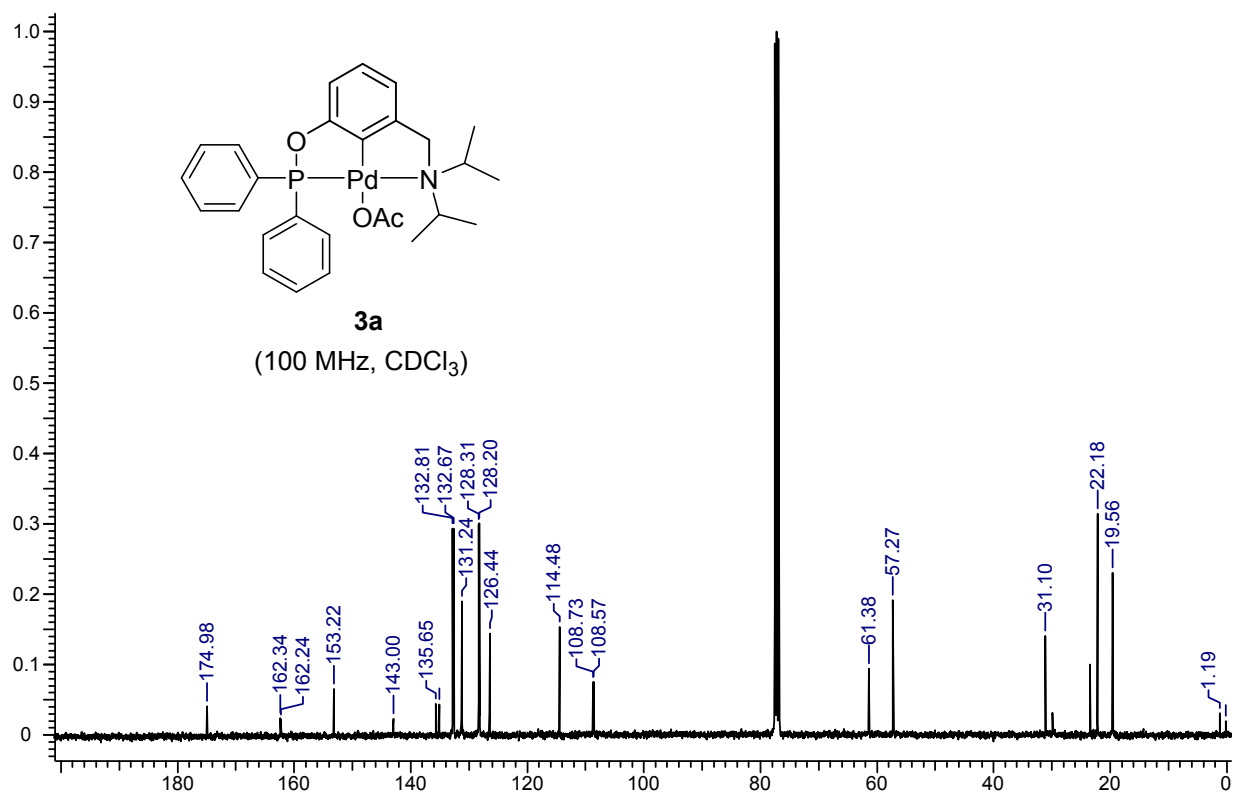



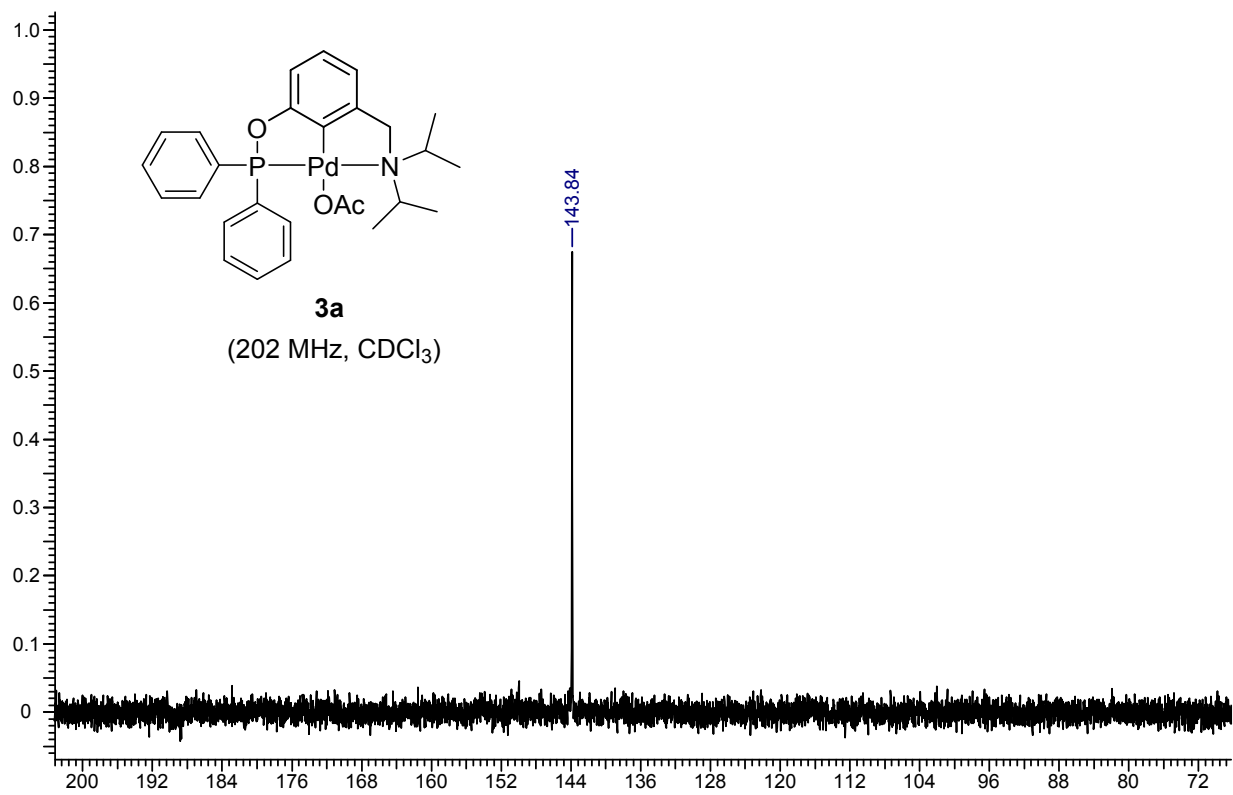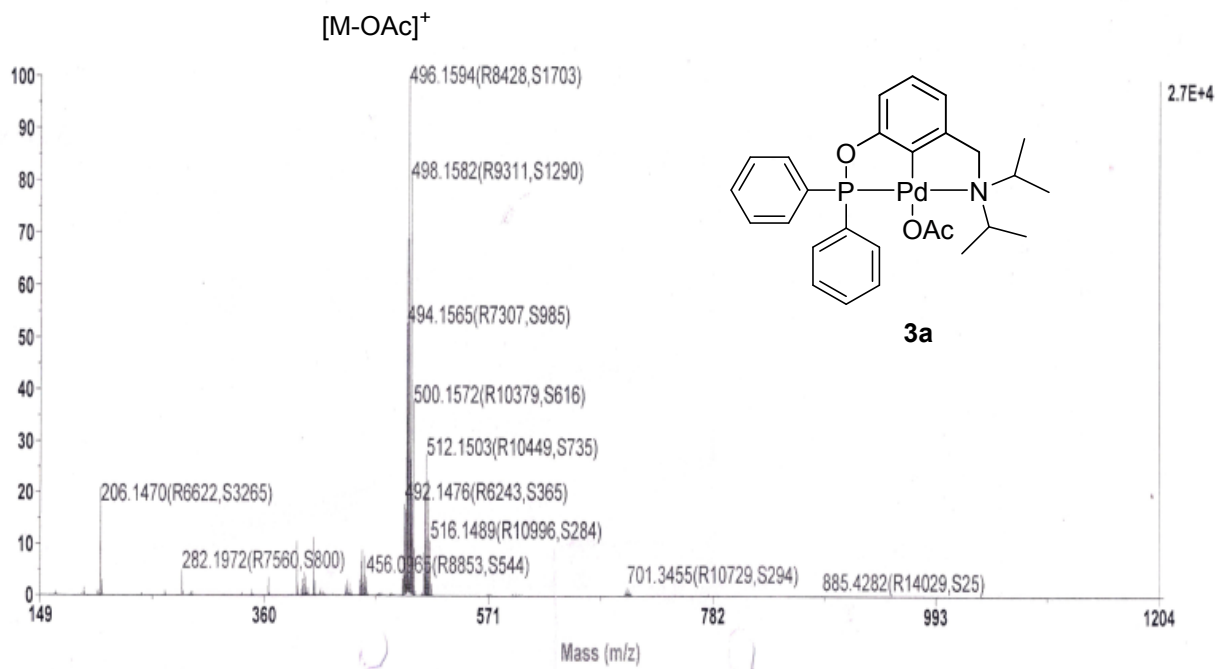

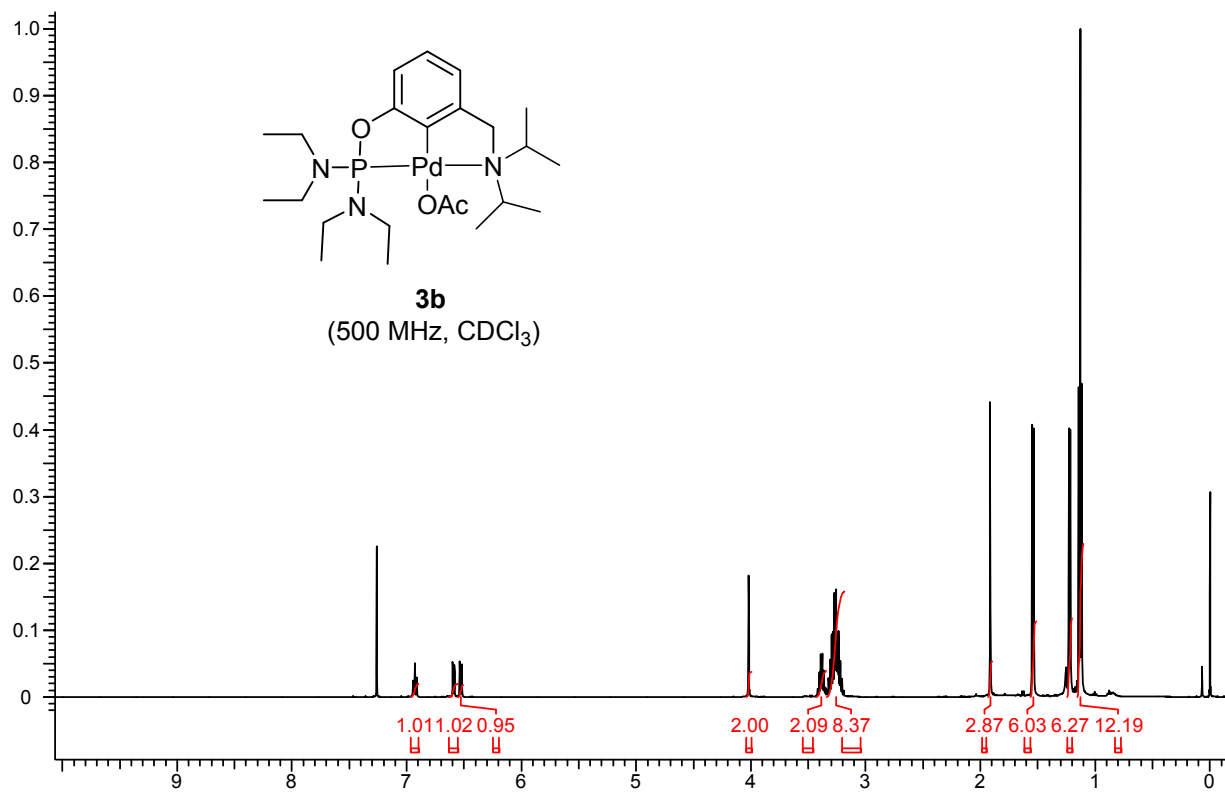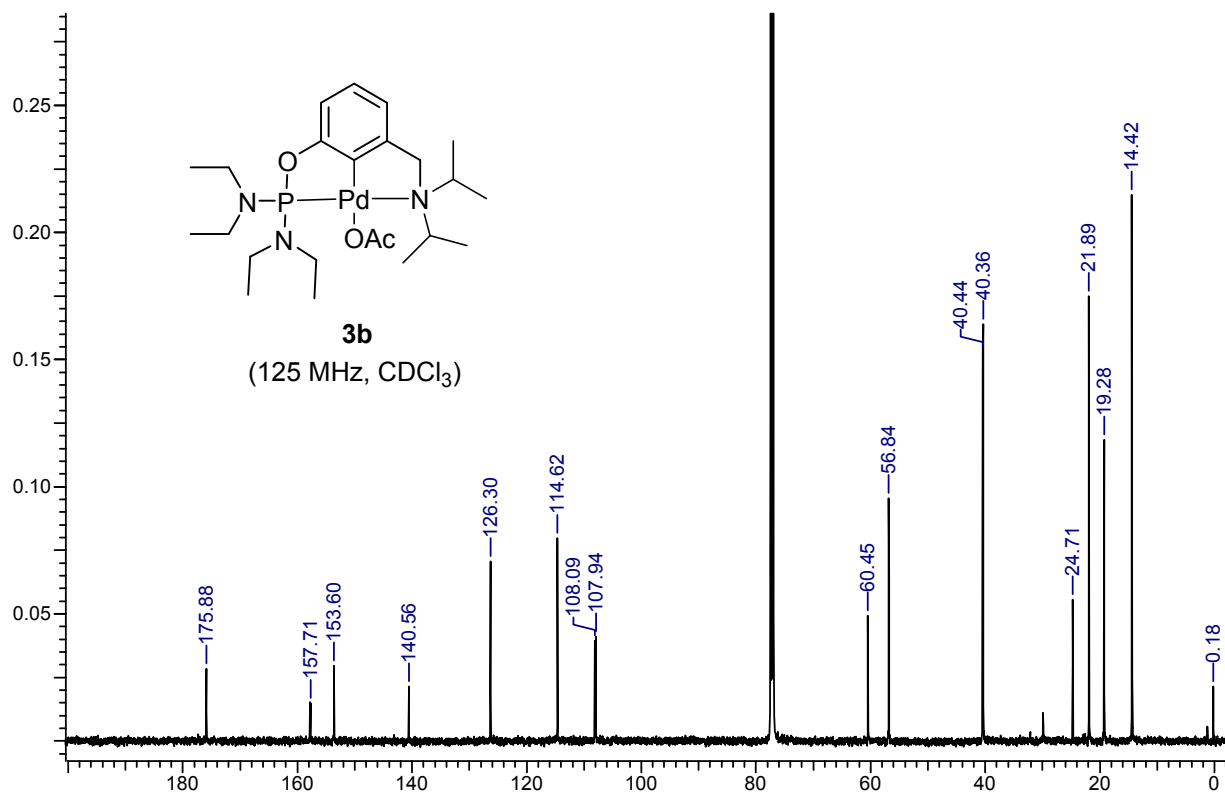

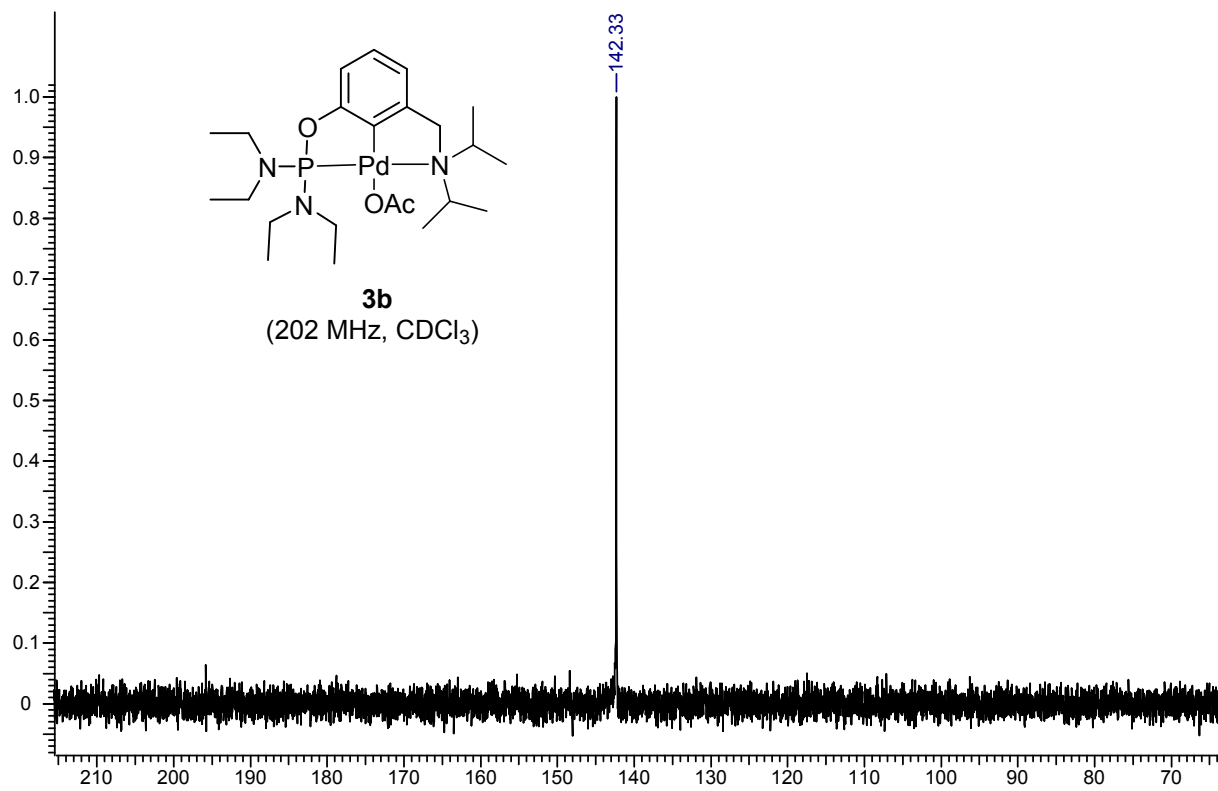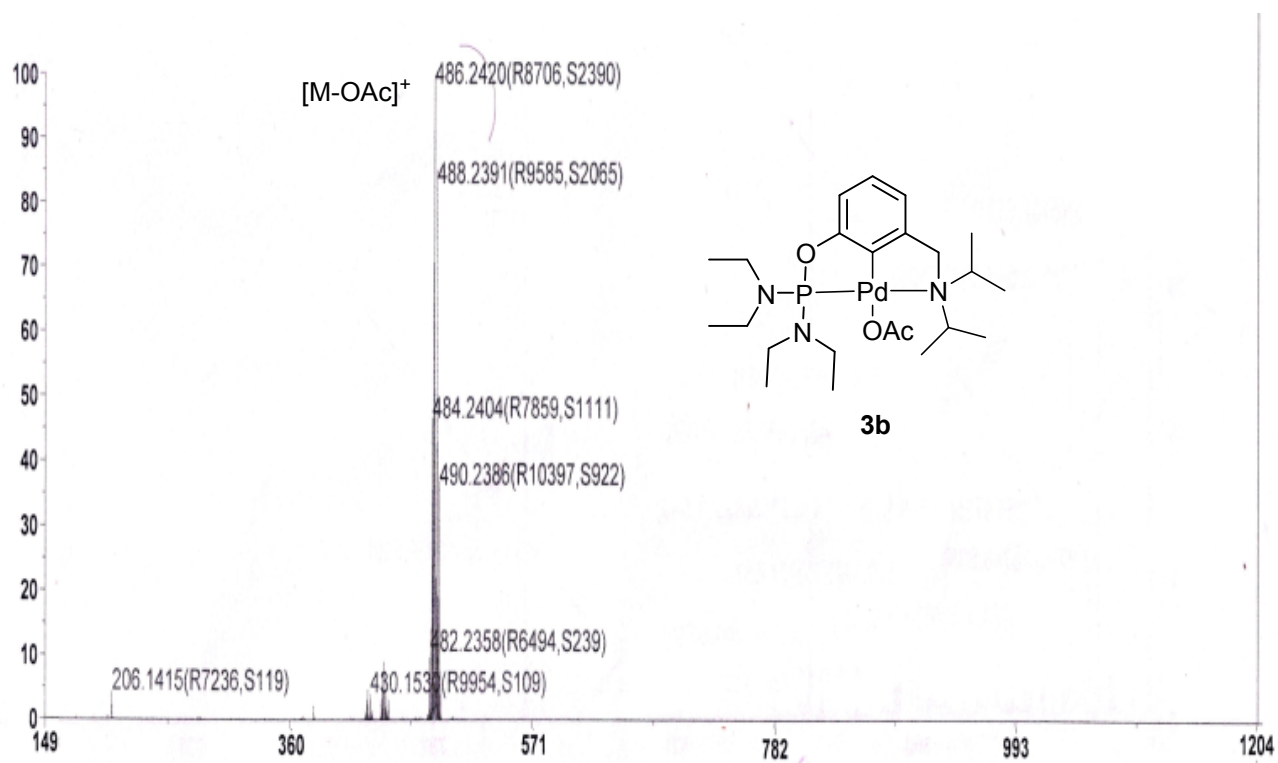

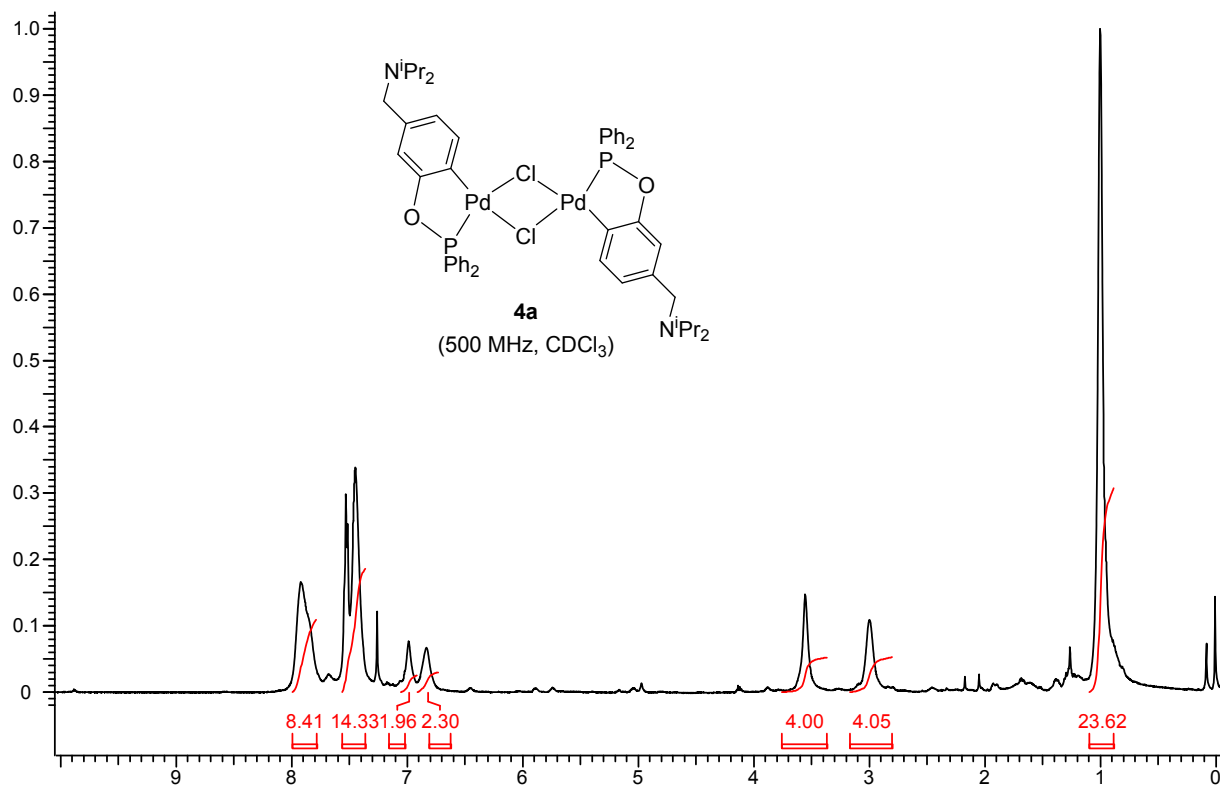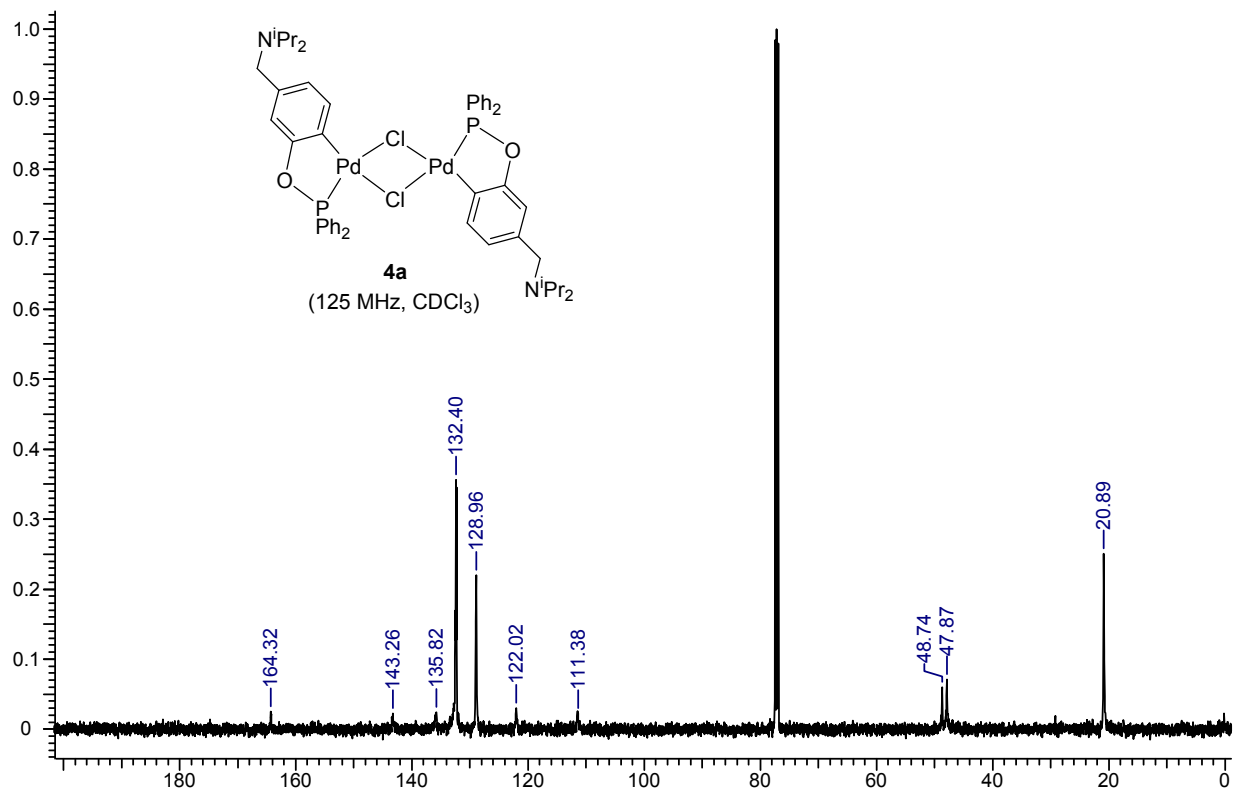

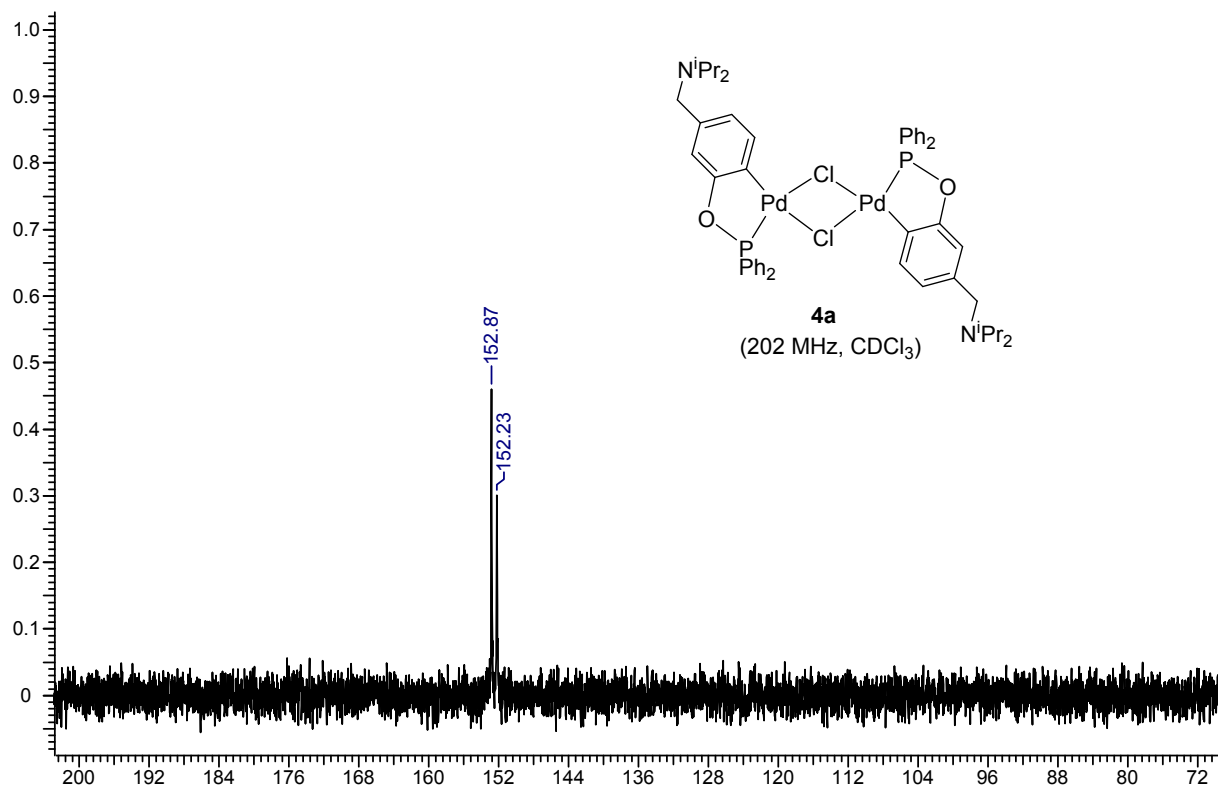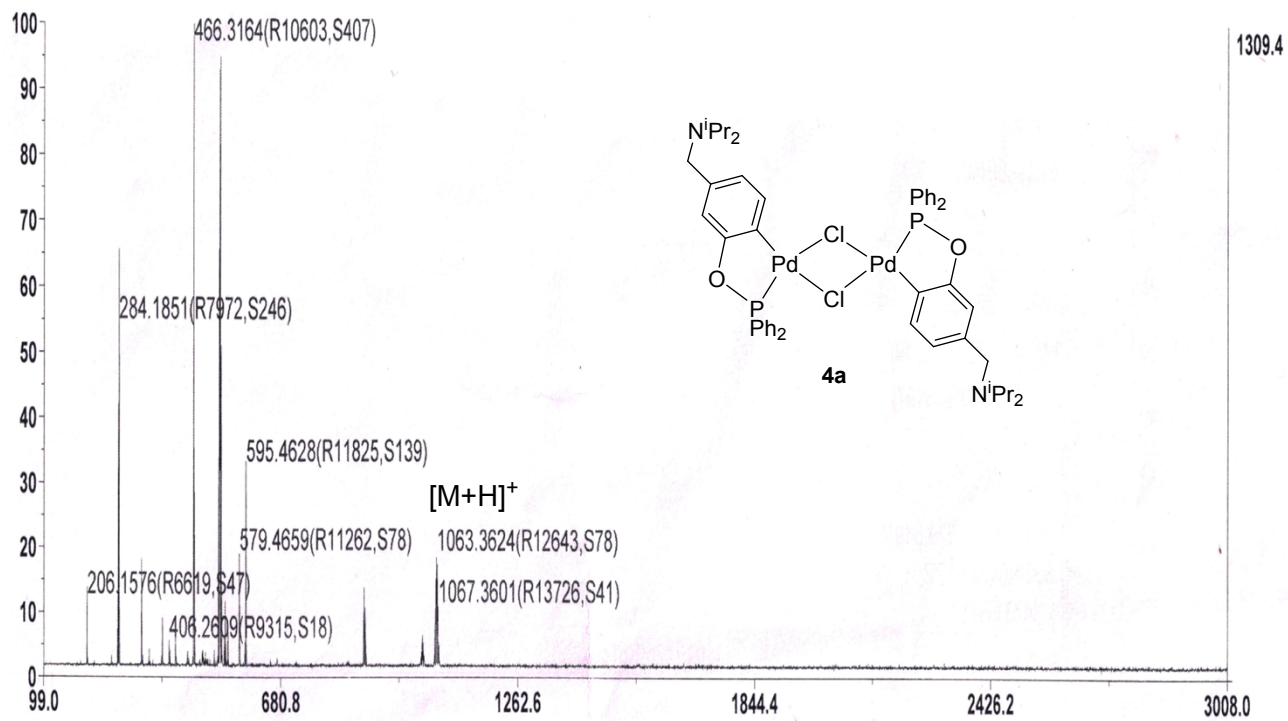

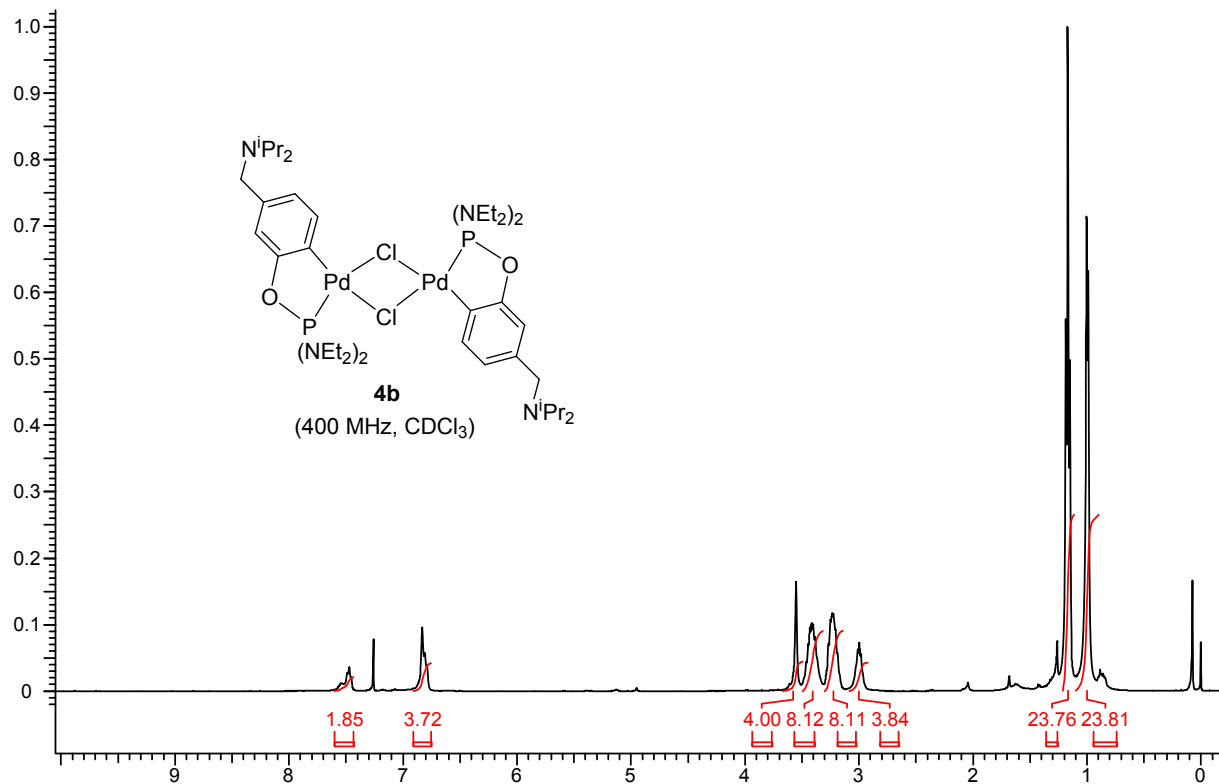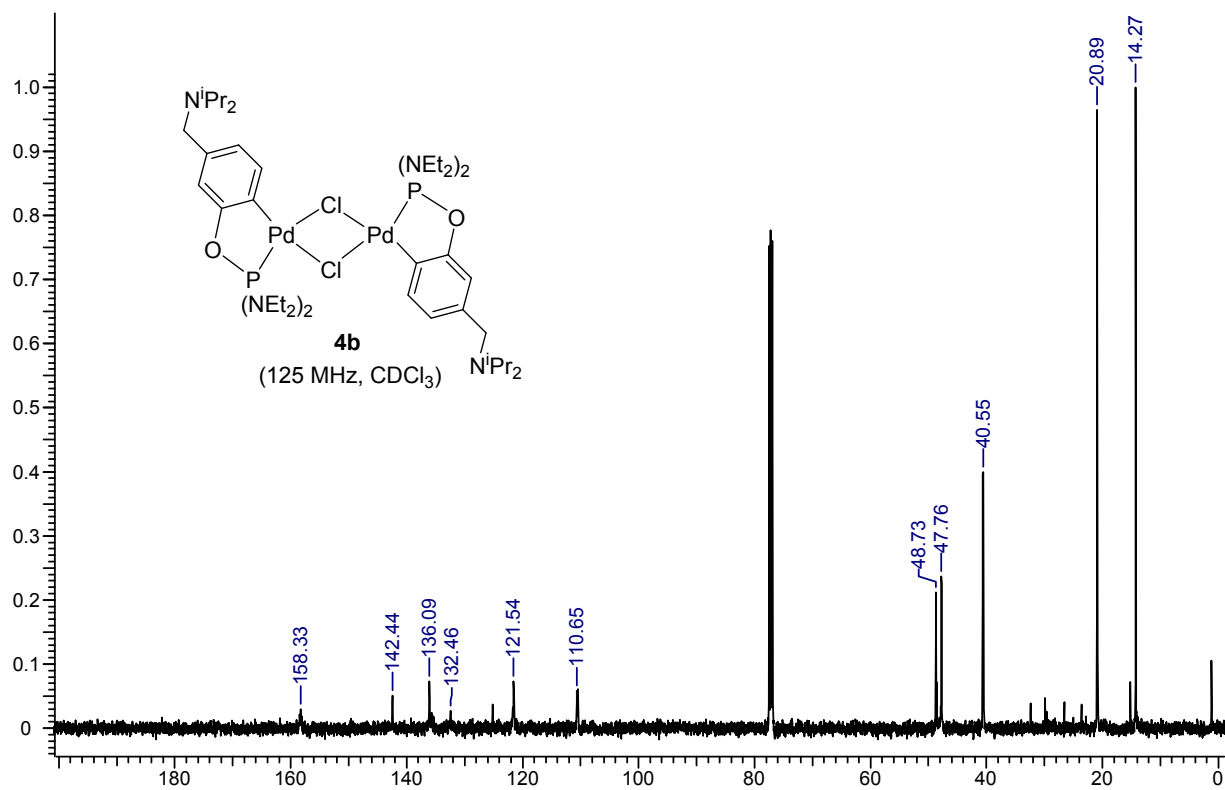

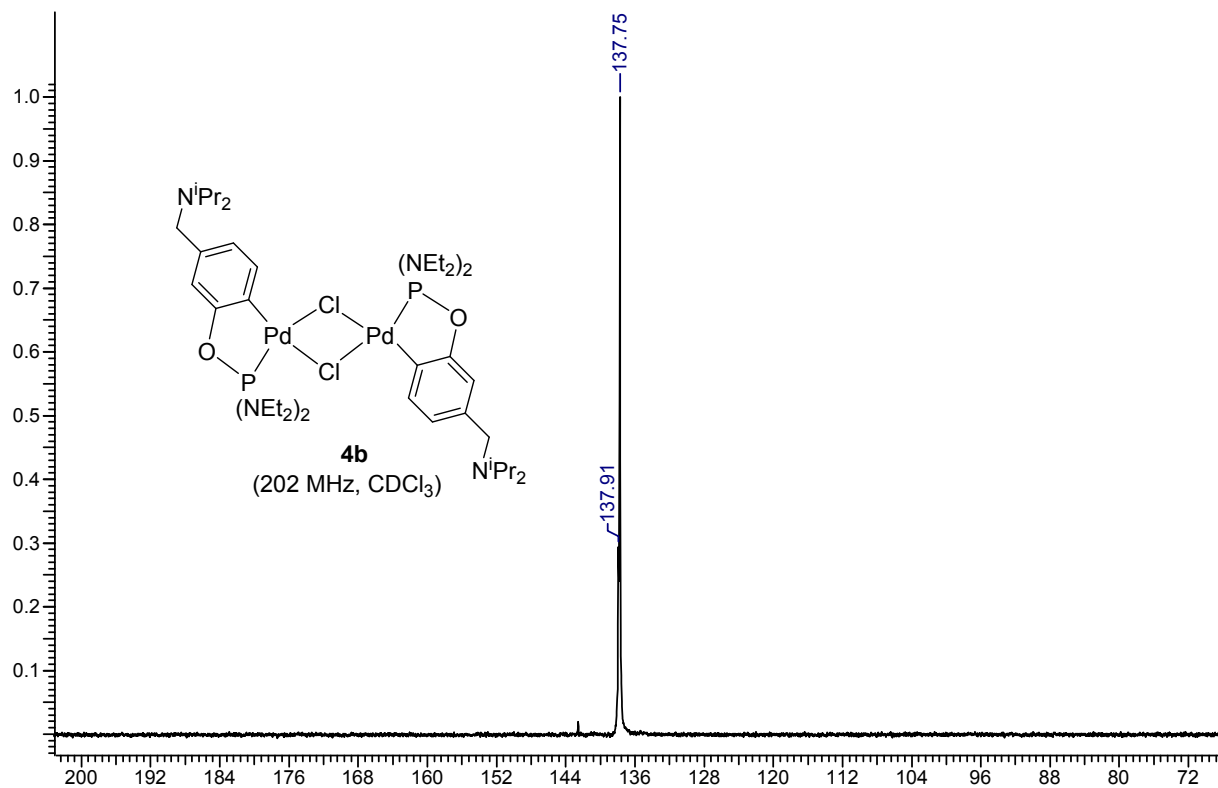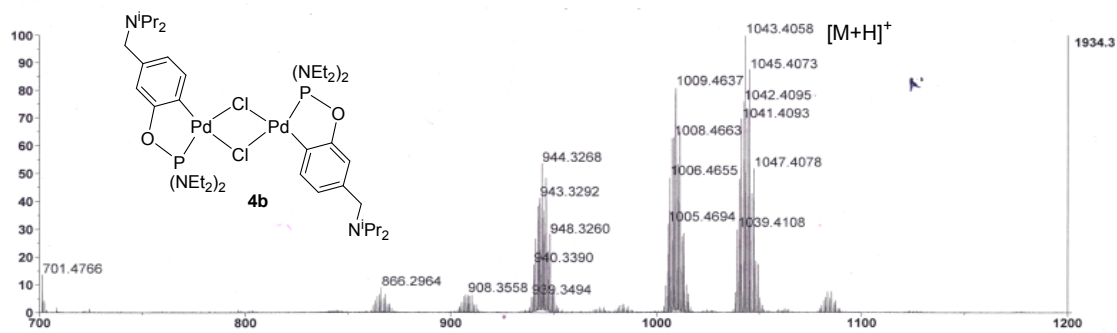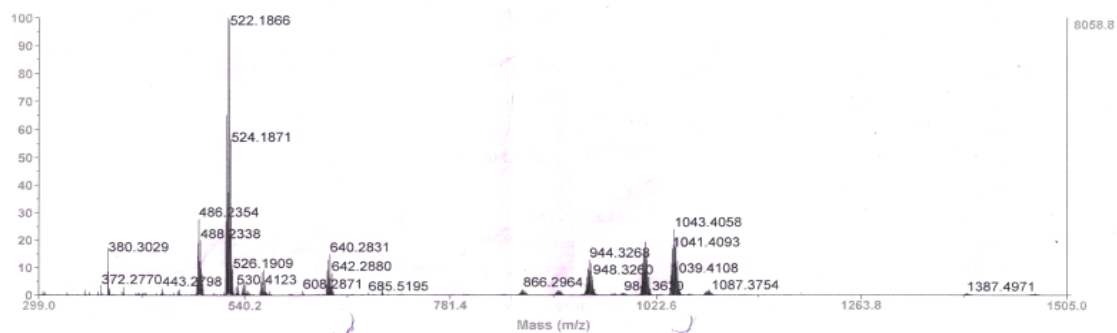

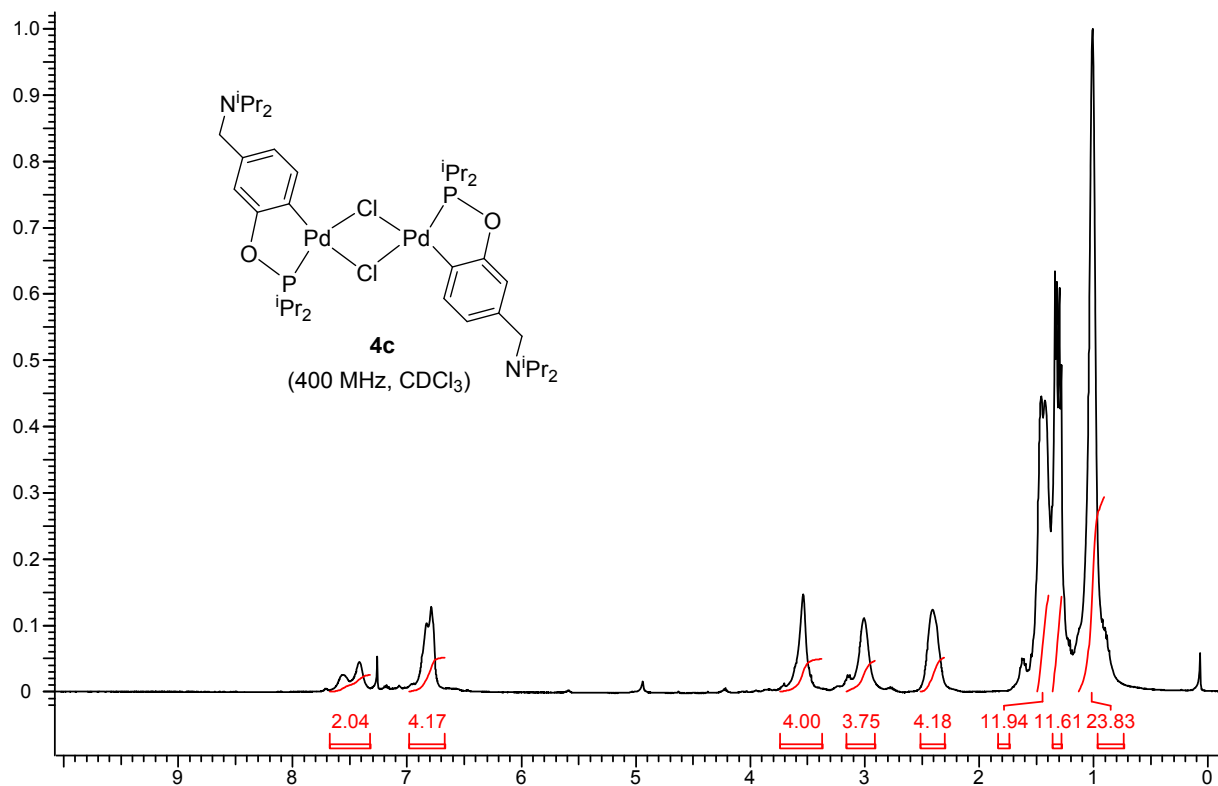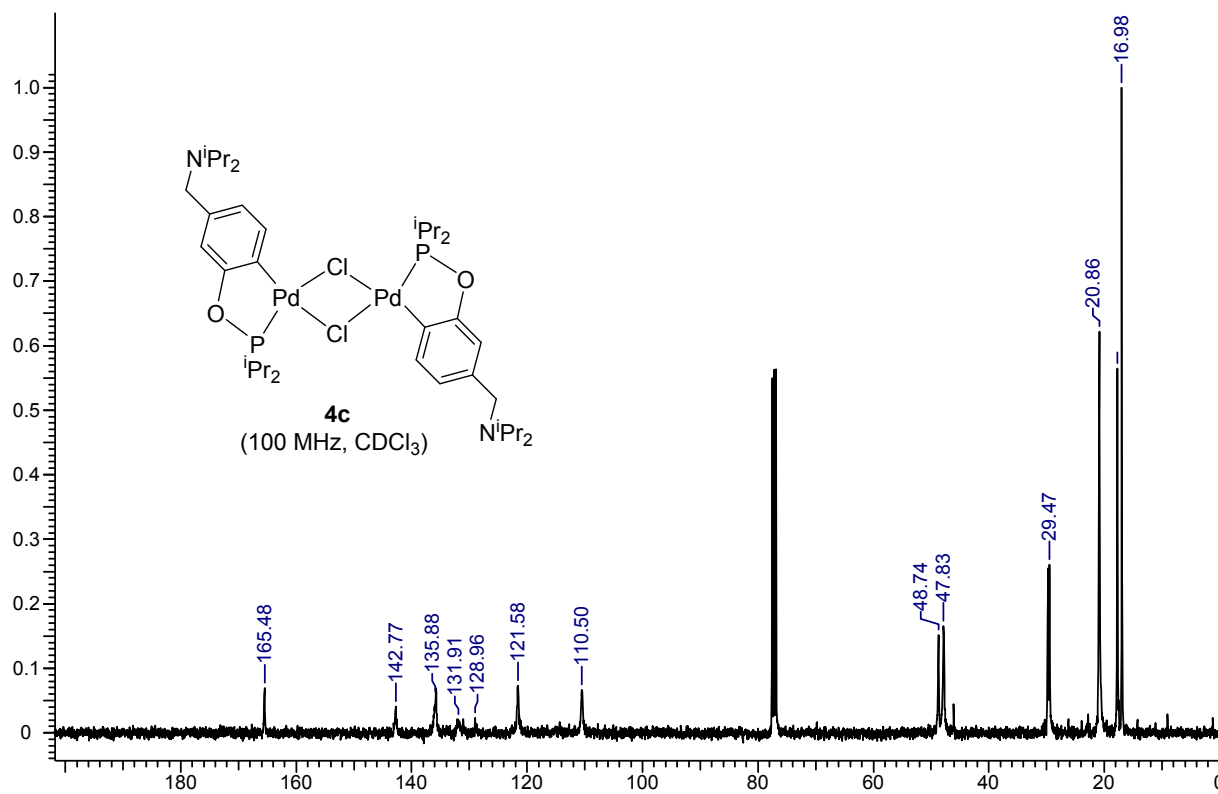



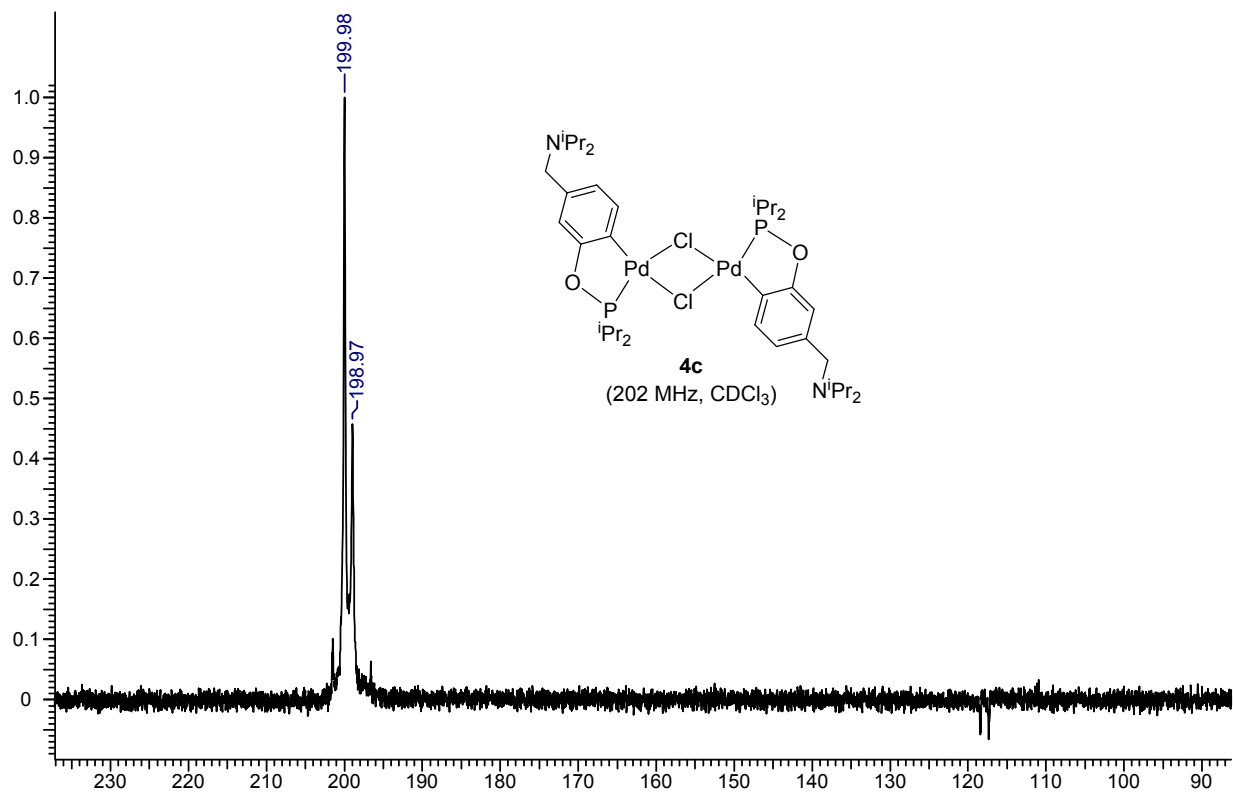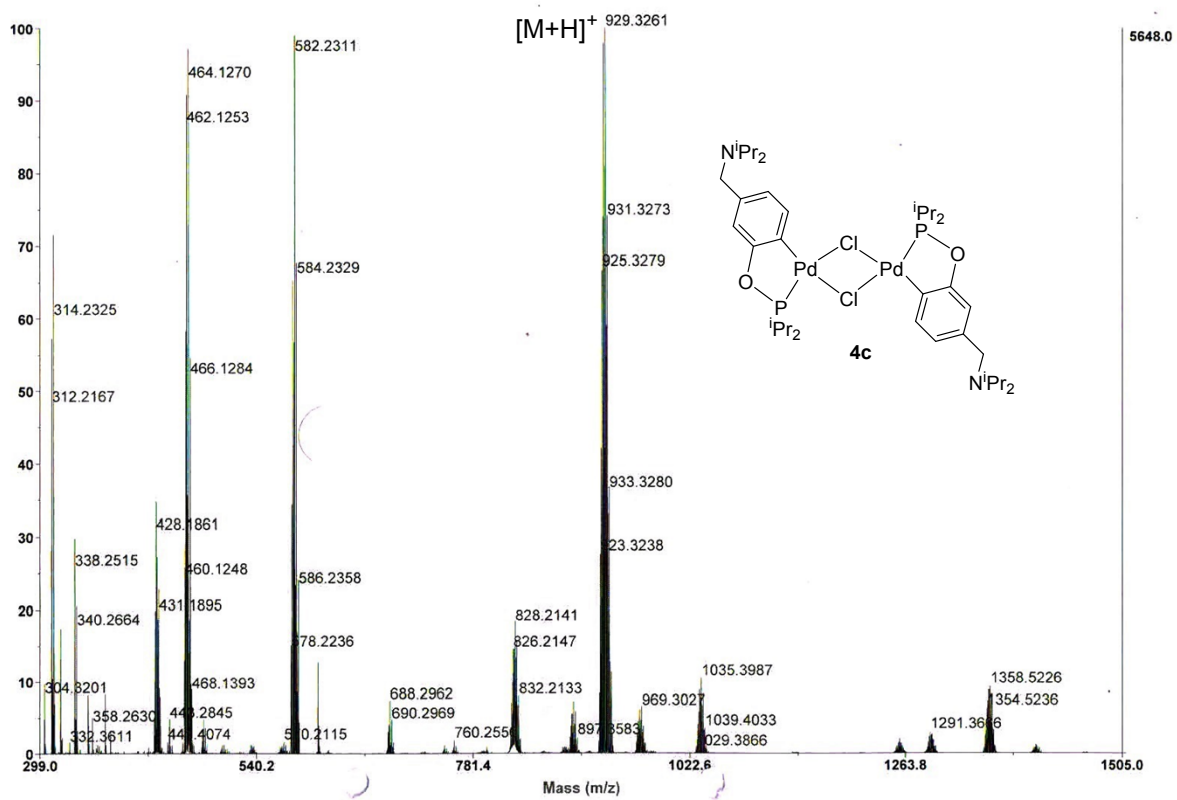

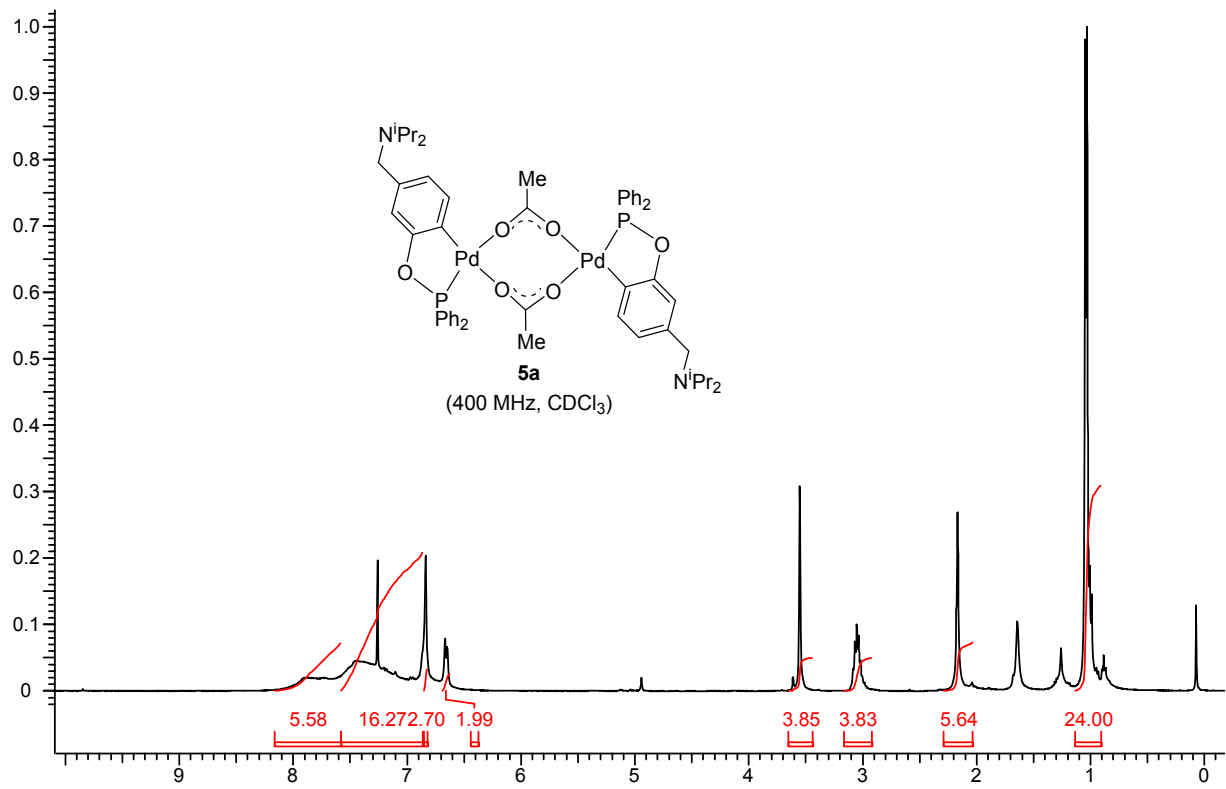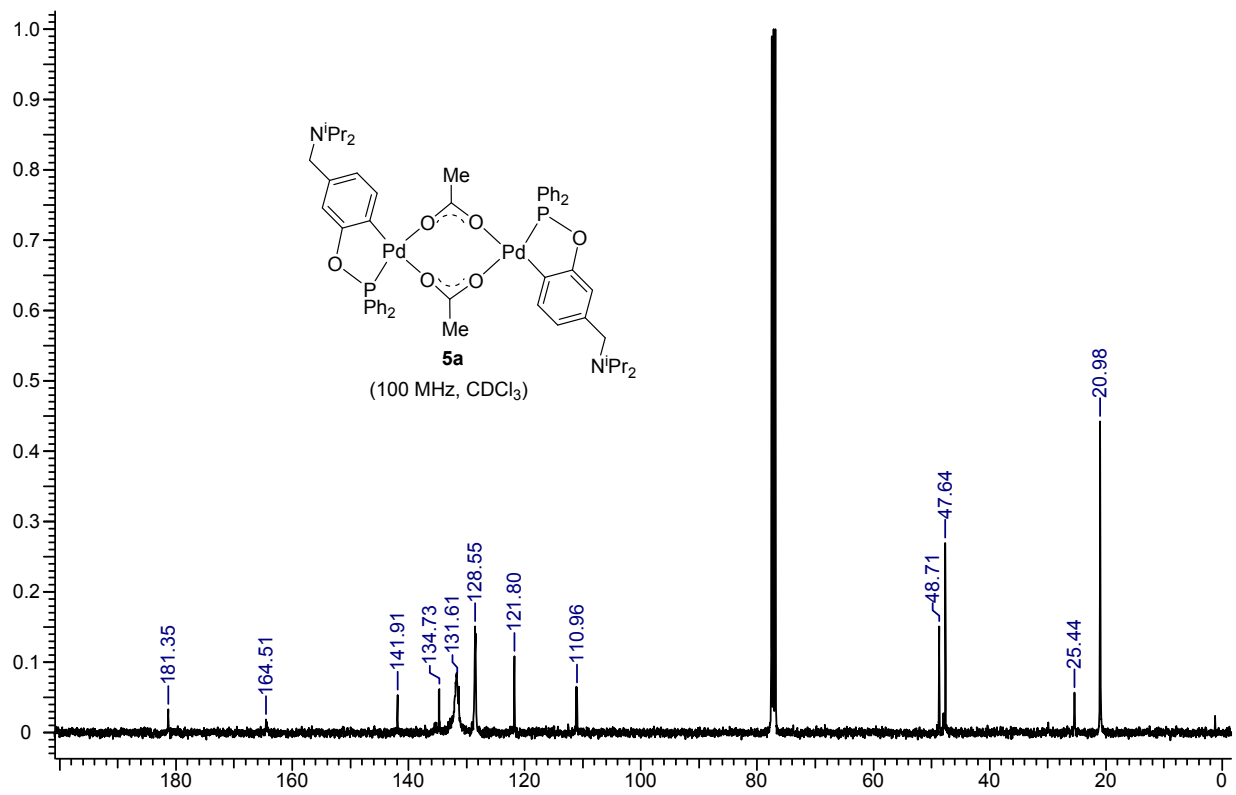

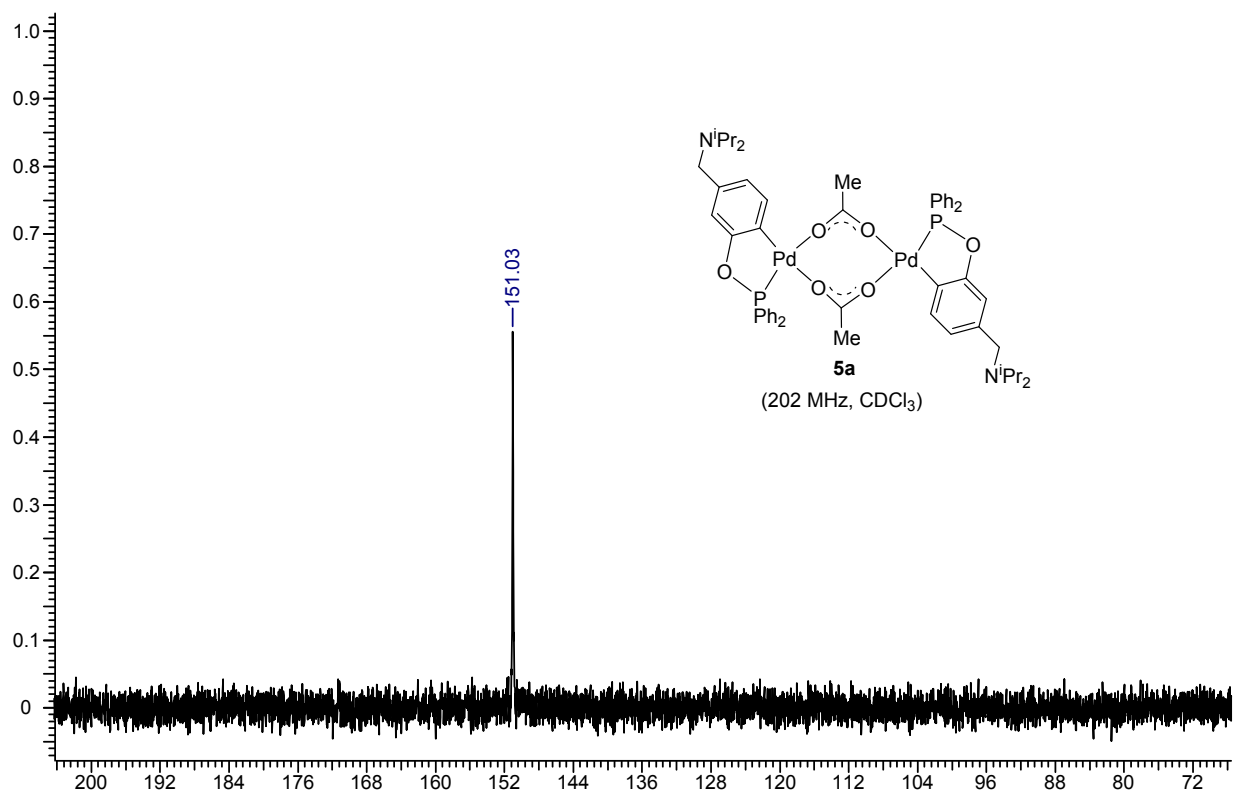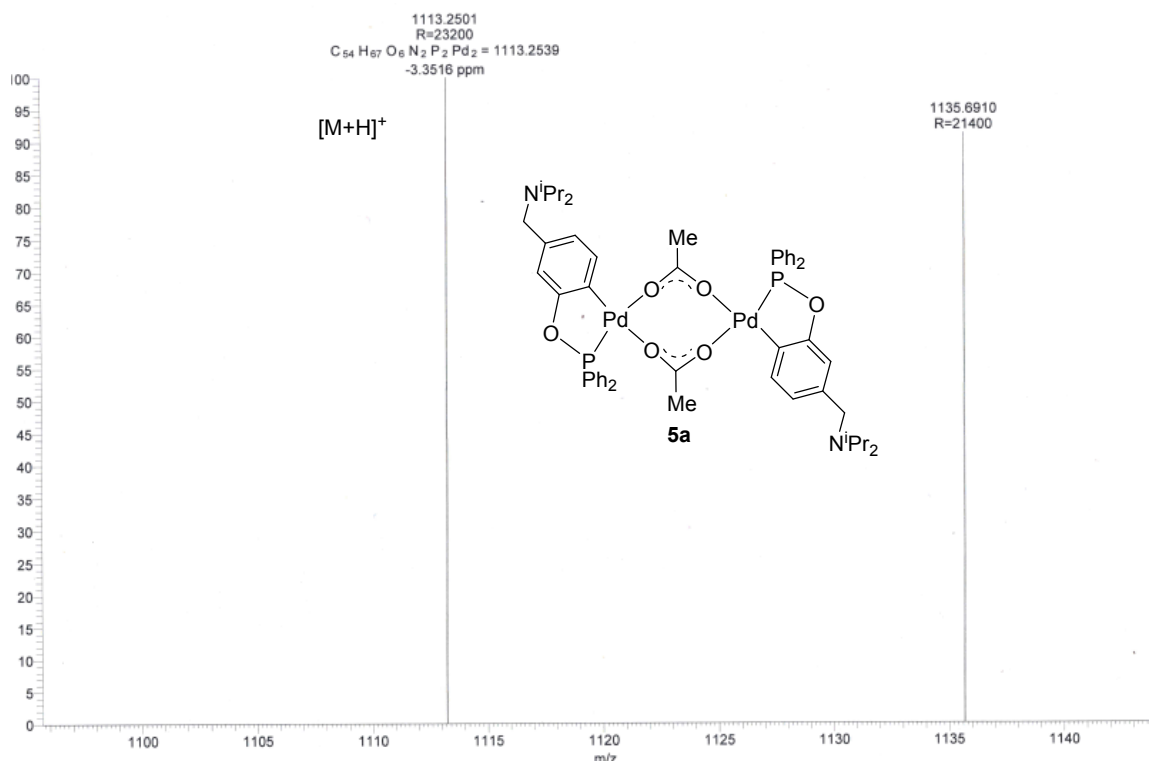

## 6. 2D NMR spectra of **2b** and **4b**

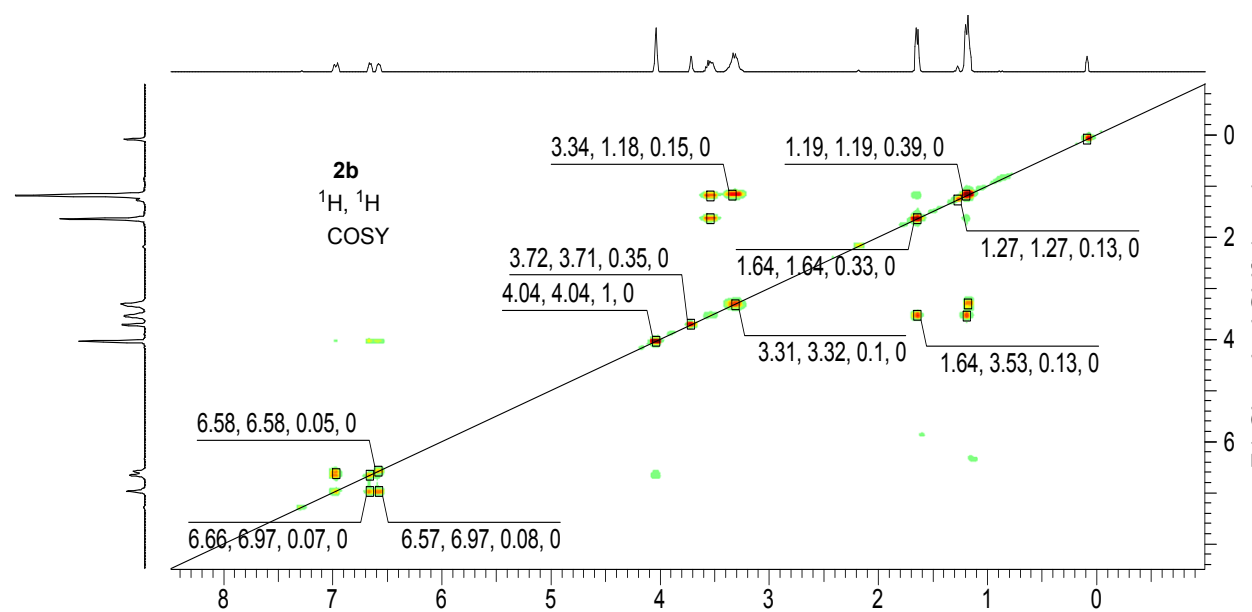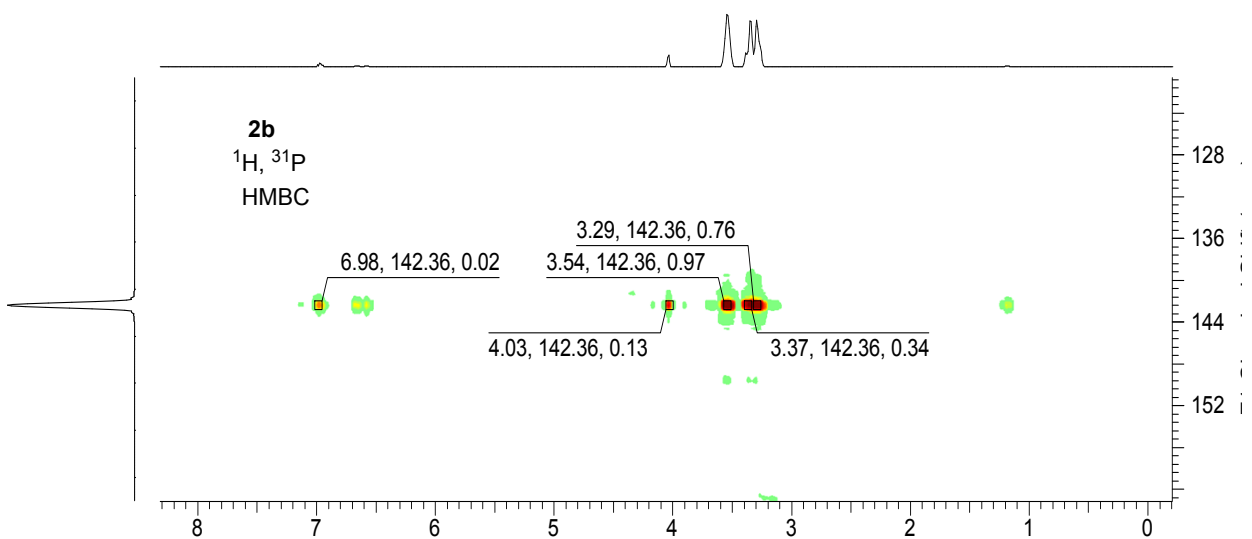

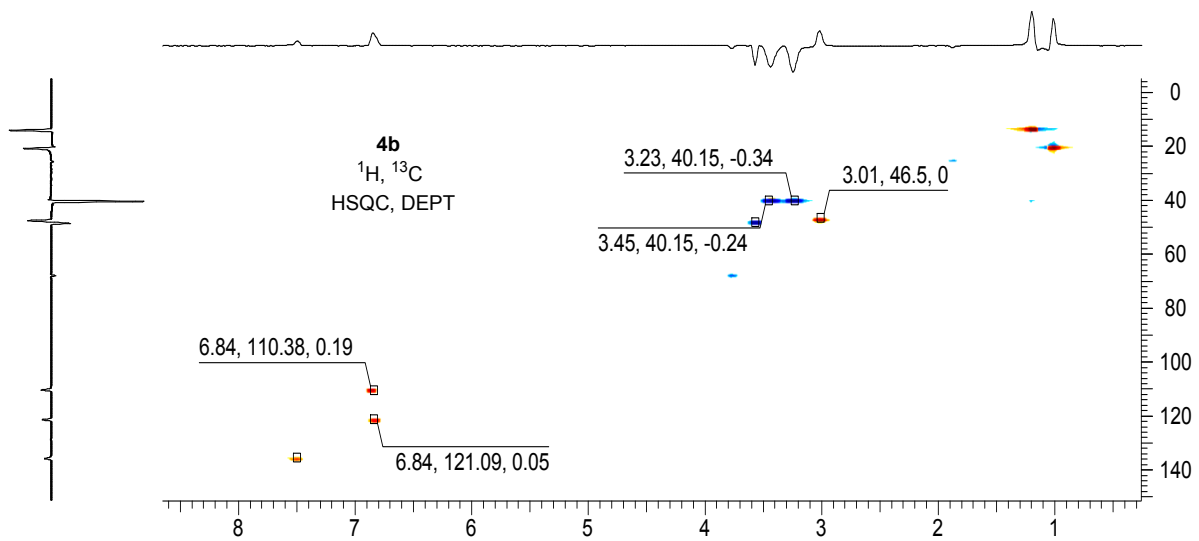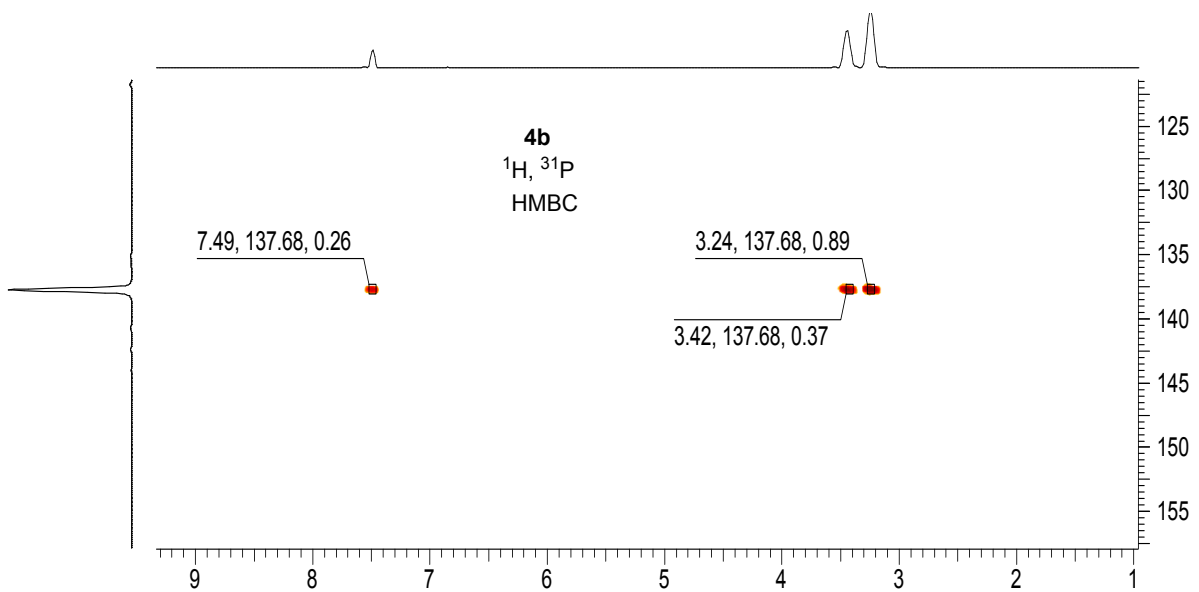

## 7. NMR and mass spectra of **8c**

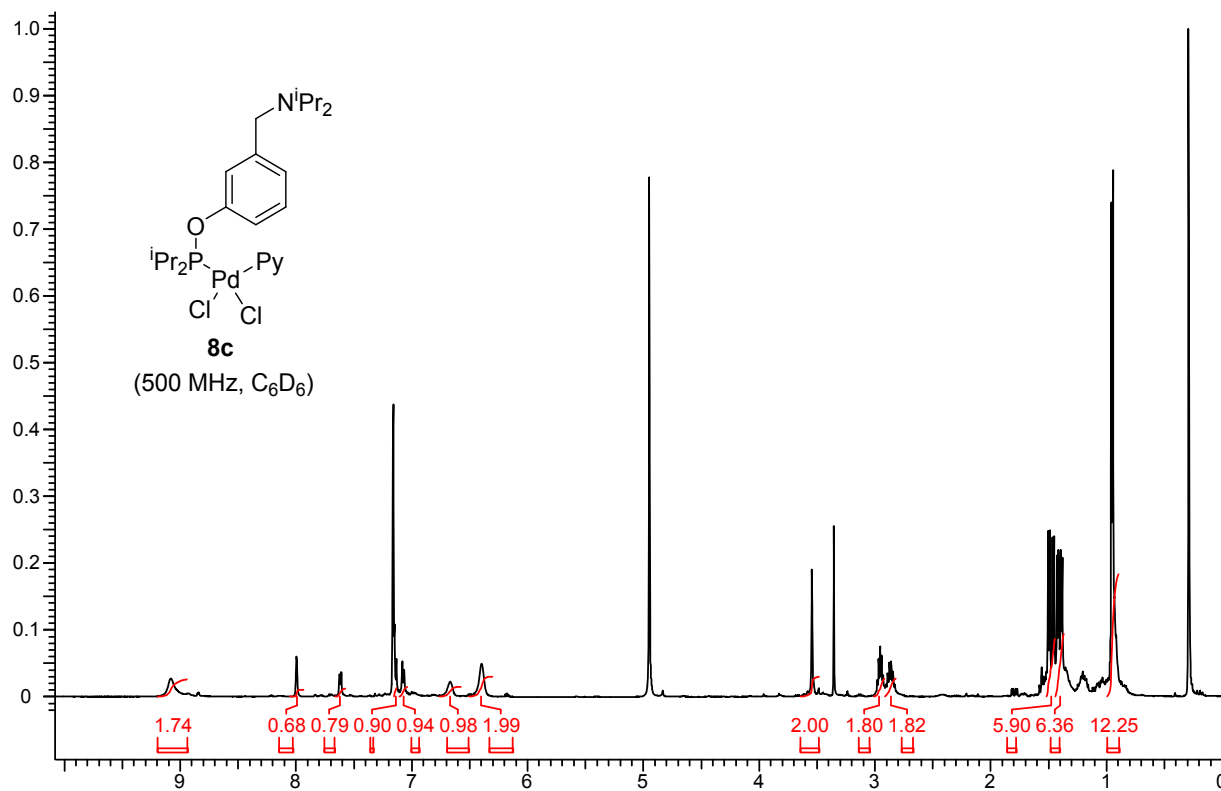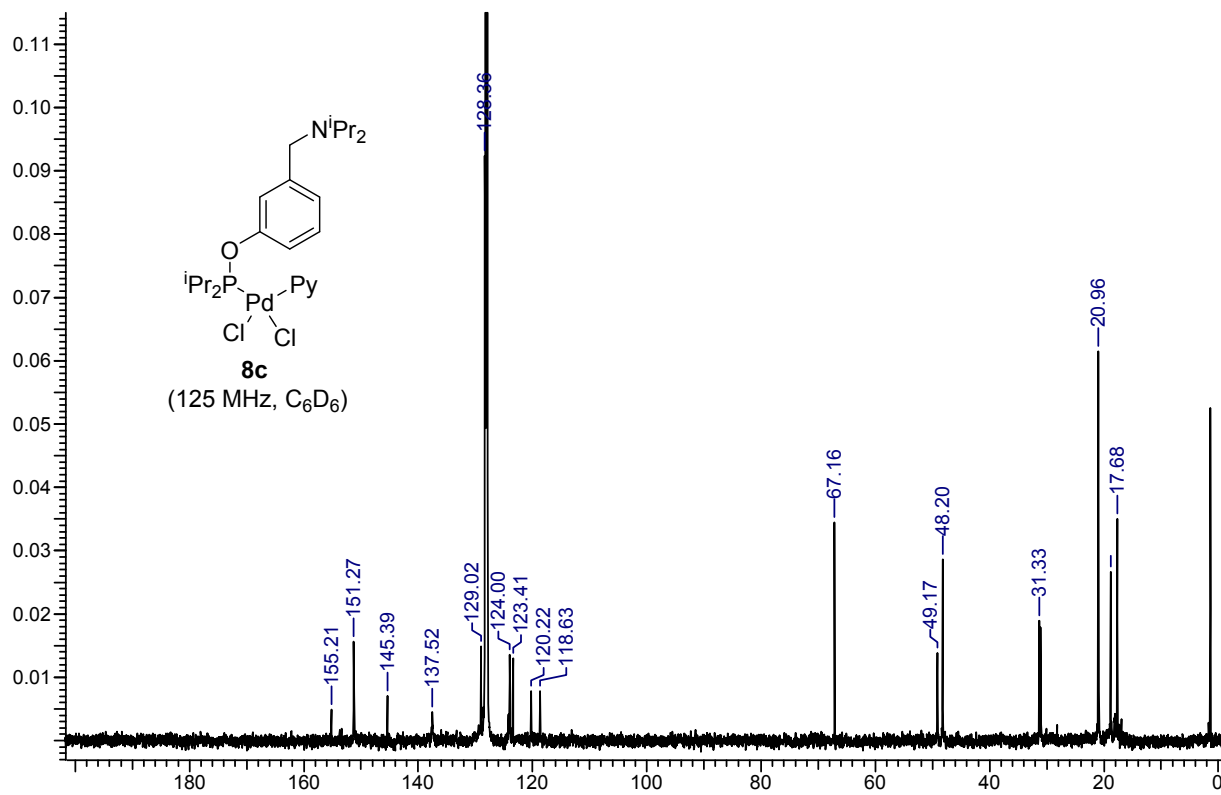

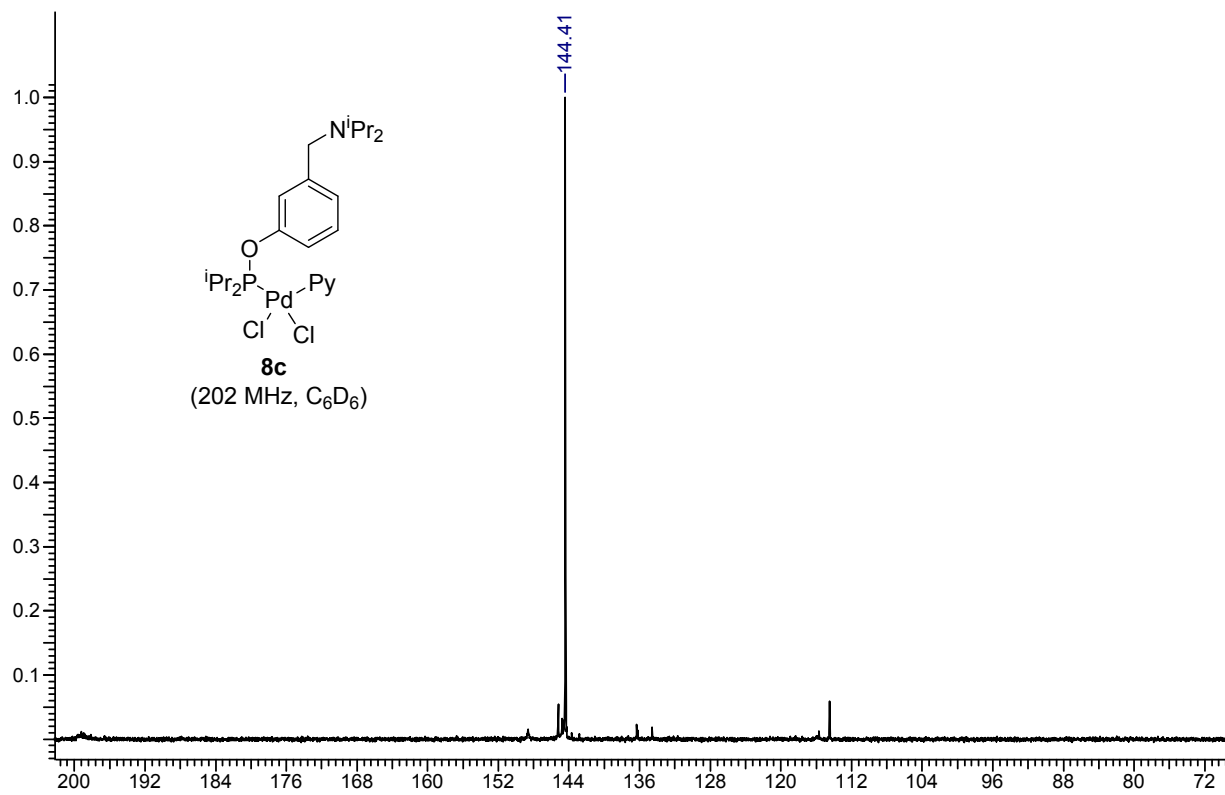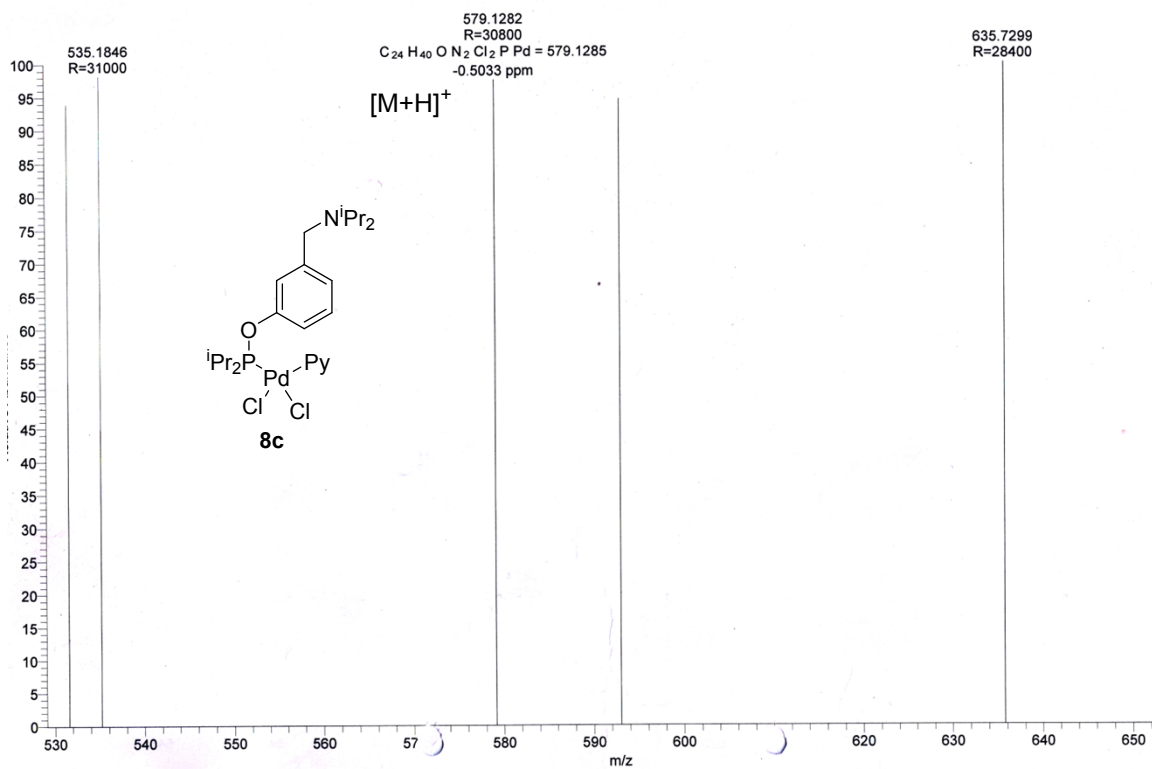

## 8. Bond lengths [ $\text{\AA}$ ] and bond angles [ $^\circ$ ] of the complexes

### Bond lengths [ $\text{\AA}$ ] and bond angles [ $^\circ$ ] for **2a**

|              |            |              |          |
|--------------|------------|--------------|----------|
| Pd(1)-C(1)   | 1.9514(16) | C(11)-C(13)  | 1.519(3) |
| Pd(1)-P(1)   | 2.1885(4)  | C(11)-H(11)  | 0.9800   |
| Pd(1)-N(1)   | 2.2032(13) | C(12)-H(12A) | 0.9600   |
| Pd(1)-Cl(1)  | 2.3848(4)  | C(12)-H(12B) | 0.9600   |
| P(1)-O(1)    | 1.6498(11) | C(12)-H(12C) | 0.9600   |
| P(1)-C(20)   | 1.8053(17) | C(13)-H(13A) | 0.9600   |
| P(1)-C(14)   | 1.8125(16) | C(13)-H(13B) | 0.9600   |
| O(1)-C(2)    | 1.396(2)   | C(13)-H(13C) | 0.9600   |
| N(1)-C(7)    | 1.508(2)   | C(14)-C(19)  | 1.391(2) |
| N(1)-C(8)    | 1.516(2)   | C(14)-C(15)  | 1.394(2) |
| N(1)-C(11)   | 1.525(2)   | C(15)-C(16)  | 1.386(3) |
| C(1)-C(2)    | 1.386(2)   | C(15)-H(15)  | 0.9300   |
| C(1)-C(6)    | 1.392(2)   | C(16)-C(17)  | 1.382(3) |
| C(2)-C(3)    | 1.382(2)   | C(16)-H(16)  | 0.9300   |
| C(3)-C(4)    | 1.390(3)   | C(17)-C(18)  | 1.386(3) |
| C(3)-H(3)    | 0.9300     | C(17)-H(17)  | 0.9300   |
| C(4)-C(5)    | 1.389(3)   | C(18)-C(19)  | 1.388(3) |
| C(4)-H(4)    | 0.9300     | C(18)-H(18)  | 0.9300   |
| C(5)-C(6)    | 1.395(2)   | C(19)-H(19)  | 0.9300   |
| C(5)-H(5)    | 0.9300     | C(20)-C(25)  | 1.389(2) |
| C(6)-C(7)    | 1.497(2)   | C(20)-C(21)  | 1.390(2) |
| C(7)-H(7A)   | 0.9700     | C(21)-C(22)  | 1.391(3) |
| C(7)-H(7B)   | 0.9700     | C(21)-H(21)  | 0.9300   |
| C(8)-C(10)   | 1.524(3)   | C(22)-C(23)  | 1.377(3) |
| C(8)-C(9)    | 1.529(3)   | C(22)-H(22)  | 0.9300   |
| C(8)-H(8)    | 0.9800     | C(23)-C(24)  | 1.385(3) |
| C(9)-H(9A)   | 0.9600     | C(23)-H(23)  | 0.9300   |
| C(9)-H(9B)   | 0.9600     | C(24)-C(25)  | 1.391(2) |
| C(9)-H(9C)   | 0.9600     | C(24)-H(24)  | 0.9300   |
| C(10)-H(10A) | 0.9600     | C(25)-H(25)  | 0.9300   |
| C(10)-H(10B) | 0.9600     |              |          |
| C(10)-H(10C) | 0.9600     |              |          |
| C(11)-C(12)  | 1.513(2)   |              |          |



|                  |            |                     |            |
|------------------|------------|---------------------|------------|
| C(1)-Pd(1)-P(1)  | 80.52(5)   | C(1)-C(6)-C(7)      | 116.98(15) |
| C(1)-Pd(1)-N(1)  | 81.72(6)   | C(5)-C(6)-C(7)      | 123.57(15) |
| P(1)-Pd(1)-N(1)  | 161.10(4)  | C(6)-C(7)-N(1)      | 112.08(13) |
| C(1)-Pd(1)-Cl(1) | 176.08(5)  | C(6)-C(7)-H(7A)     | 109.2      |
| P(1)-Pd(1)-Cl(1) | 98.672(16) | N(1)-C(7)-H(7A)     | 109.2      |
| N(1)-Pd(1)-Cl(1) | 99.48(4)   | C(6)-C(7)-H(7B)     | 109.2      |
| O(1)-P(1)-C(20)  | 102.66(7)  | N(1)-C(7)-H(7B)     | 109.2      |
| O(1)-P(1)-C(14)  | 101.65(7)  | H(7A)-C(7)-H(7B)    | 107.9      |
| C(20)-P(1)-C(14) | 105.67(7)  | N(1)-C(8)-C(10)     | 111.60(15) |
| O(1)-P(1)-Pd(1)  | 107.18(4)  | N(1)-C(8)-C(9)      | 113.64(15) |
| C(20)-P(1)-Pd(1) | 117.03(5)  | C(10)-C(8)-C(9)     | 111.03(17) |
| C(14)-P(1)-Pd(1) | 120.19(5)  | N(1)-C(8)-H(8)      | 106.7      |
| C(2)-O(1)-P(1)   | 112.28(10) | C(10)-C(8)-H(8)     | 106.7      |
| C(7)-N(1)-C(8)   | 110.36(13) | C(9)-C(8)-H(8)      | 106.7      |
| C(7)-N(1)-C(11)  | 107.79(12) | C(8)-C(9)-H(9A)     | 109.5      |
| C(8)-N(1)-C(11)  | 112.02(13) | C(8)-C(9)-H(9B)     | 109.5      |
| C(7)-N(1)-Pd(1)  | 107.65(10) | H(9A)-C(9)-H(9B)    | 109.5      |
| C(8)-N(1)-Pd(1)  | 109.14(10) | C(8)-C(9)-H(9C)     | 109.5      |
| C(11)-N(1)-Pd(1) | 109.77(10) | H(9A)-C(9)-H(9C)    | 109.5      |
| C(2)-C(1)-C(6)   | 119.31(15) | H(9B)-C(9)-H(9C)    | 109.5      |
| C(2)-C(1)-Pd(1)  | 122.34(12) | C(8)-C(10)-H(10A)   | 109.5      |
| C(6)-C(1)-Pd(1)  | 118.35(12) | C(8)-C(10)-H(10B)   | 109.5      |
| C(3)-C(2)-C(1)   | 122.31(15) | H(10A)-C(10)-H(10B) | 109.5      |
| C(3)-C(2)-O(1)   | 120.04(15) | C(8)-C(10)-H(10C)   | 109.5      |
| C(1)-C(2)-O(1)   | 117.65(14) | H(10A)-C(10)-H(10C) | 109.5      |
| C(2)-C(3)-C(4)   | 117.75(16) | H(10B)-C(10)-H(10C) | 109.5      |
| C(2)-C(3)-H(3)   | 121.1      | C(12)-C(11)-C(13)   | 109.60(16) |
| C(4)-C(3)-H(3)   | 121.1      | C(12)-C(11)-N(1)    | 112.68(14) |
| C(5)-C(4)-C(3)   | 121.33(16) | C(13)-C(11)-N(1)    | 111.60(14) |
| C(5)-C(4)-H(4)   | 119.3      | C(12)-C(11)-H(11)   | 107.6      |
| C(3)-C(4)-H(4)   | 119.3      | C(13)-C(11)-H(11)   | 107.6      |
| C(4)-C(5)-C(6)   | 119.89(16) | N(1)-C(11)-H(11)    | 107.6      |
| C(4)-C(5)-H(5)   | 120.1      | C(11)-C(12)-H(12A)  | 109.5      |
| C(6)-C(5)-H(5)   | 120.1      | C(11)-C(12)-H(12B)  | 109.5      |
| C(1)-C(6)-C(5)   | 119.41(16) | H(12A)-C(12)-H(12B) | 109.5      |

|                     |            |                   |            |
|---------------------|------------|-------------------|------------|
| C(11)-C(12)-H(12C)  | 109.5      | C(21)-C(22)-H(22) | 119.8      |
| H(12A)-C(12)-H(12C) | 109.5      | C(22)-C(23)-C(24) | 120.04(16) |
| H(12B)-C(12)-H(12C) | 109.5      | C(22)-C(23)-H(23) | 120.0      |
| C(11)-C(13)-H(13A)  | 109.5      | C(24)-C(23)-H(23) | 120.0      |
| C(11)-C(13)-H(13B)  | 109.5      | C(23)-C(24)-C(25) | 120.16(17) |
| H(13A)-C(13)-H(13B) | 109.5      | C(23)-C(24)-H(24) | 119.9      |
| C(11)-C(13)-H(13C)  | 109.5      | C(25)-C(24)-H(24) | 119.9      |
| H(13A)-C(13)-H(13C) | 109.5      | C(20)-C(25)-C(24) | 119.83(16) |
| H(13B)-C(13)-H(13C) | 109.5      | C(20)-C(25)-H(25) | 120.1      |
| C(19)-C(14)-C(15)   | 119.16(16) | C(24)-C(25)-H(25) | 120.1      |
| C(19)-C(14)-P(1)    | 122.24(13) |                   |            |
| C(15)-C(14)-P(1)    | 118.53(12) |                   |            |
| C(16)-C(15)-C(14)   | 120.36(16) |                   |            |
| C(16)-C(15)-H(15)   | 119.8      |                   |            |
| C(14)-C(15)-H(15)   | 119.8      |                   |            |
| C(17)-C(16)-C(15)   | 120.29(17) |                   |            |
| C(17)-C(16)-H(16)   | 119.9      |                   |            |
| C(15)-C(16)-H(16)   | 119.9      |                   |            |
| C(16)-C(17)-C(18)   | 119.68(17) |                   |            |
| C(16)-C(17)-H(17)   | 120.2      |                   |            |
| C(18)-C(17)-H(17)   | 120.2      |                   |            |
| C(17)-C(18)-C(19)   | 120.38(17) |                   |            |
| C(17)-C(18)-H(18)   | 119.8      |                   |            |
| C(19)-C(18)-H(18)   | 119.8      |                   |            |
| C(18)-C(19)-C(14)   | 120.10(16) |                   |            |
| C(18)-C(19)-H(19)   | 119.9      |                   |            |
| C(14)-C(19)-H(19)   | 119.9      |                   |            |
| C(25)-C(20)-C(21)   | 119.81(16) |                   |            |
| C(25)-C(20)-P(1)    | 118.29(12) |                   |            |
| C(21)-C(20)-P(1)    | 121.88(13) |                   |            |
| C(20)-C(21)-C(22)   | 119.85(16) |                   |            |
| C(20)-C(21)-H(21)   | 120.1      |                   |            |
| C(22)-C(21)-H(21)   | 120.1      |                   |            |
| C(23)-C(22)-C(21)   | 120.31(16) |                   |            |
| C(23)-C(22)-H(22)   | 119.8      |                   |            |

Bond lengths [ $\text{\AA}$ ] and bond angles [ $^\circ$ ] for **2b**

|              |            |              |          |
|--------------|------------|--------------|----------|
| Pd(1)-C(1)   | 1.960(2)   | C(10)-H(10B) | 0.9600   |
| Pd(1)-P(1)   | 2.1951(6)  | C(10)-H(10C) | 0.9600   |
| Pd(1)-N(1)   | 2.2361(16) | C(11)-C(12)  | 1.524(3) |
| Pd(1)-Cl(1)  | 2.4082(6)  | C(11)-C(13)  | 1.527(3) |
| P(1)-N(3)    | 1.637(2)   | C(11)-H(11)  | 0.9800   |
| P(1)-O(1)    | 1.6524(16) | C(12)-H(12A) | 0.9600   |
| P(1)-N(2)    | 1.658(2)   | C(12)-H(12B) | 0.9600   |
| O(1)-C(2)    | 1.393(3)   | C(12)-H(12C) | 0.9600   |
| N(1)-C(11)   | 1.511(3)   | C(13)-H(13A) | 0.9600   |
| N(1)-C(7)    | 1.509(3)   | C(13)-H(13B) | 0.9600   |
| N(1)-C(8)    | 1.510(3)   | C(13)-H(13C) | 0.9600   |
| N(2)-C(16)   | 1.458(3)   | C(14)-C(15)  | 1.507(4) |
| N(2)-C(14)   | 1.472(3)   | C(14)-H(14A) | 0.9700   |
| N(3)-C(20)   | 1.470(3)   | C(14)-H(14B) | 0.9700   |
| N(3)-C(18)   | 1.468(3)   | C(15)-H(15A) | 0.9600   |
| C(1)-C(2)    | 1.381(3)   | C(15)-H(15B) | 0.9600   |
| C(1)-C(6)    | 1.388(3)   | C(15)-H(15C) | 0.9600   |
| C(2)-C(3)    | 1.384(3)   | C(16)-C(17)  | 1.497(5) |
| C(3)-C(4)    | 1.387(4)   | C(16)-H(16A) | 0.9700   |
| C(3)-H(3)    | 0.9300     | C(16)-H(16B) | 0.9700   |
| C(4)-C(5)    | 1.383(4)   | C(17)-H(17A) | 0.9600   |
| C(4)-H(4)    | 0.9300     | C(17)-H(17B) | 0.9600   |
| C(5)-C(6)    | 1.398(3)   | C(17)-H(17C) | 0.9600   |
| C(5)-H(5)    | 0.9300     | C(18)-C(19)  | 1.509(4) |
| C(6)-C(7)    | 1.499(3)   | C(18)-H(18A) | 0.9700   |
| C(7)-H(7A)   | 0.9700     | C(18)-H(18B) | 0.9700   |
| C(7)-H(7B)   | 0.9700     | C(19)-H(19A) | 0.9600   |
| C(8)-C(9)    | 1.521(4)   | C(19)-H(19B) | 0.9600   |
| C(8)-C(10)   | 1.521(3)   | C(19)-H(19C) | 0.9600   |
| C(8)-H(8)    | 0.9800     | C(20)-C(21)  | 1.503(4) |
| C(9)-H(9A)   | 0.9600     | C(20)-H(20A) | 0.9700   |
| C(9)-H(9B)   | 0.9600     | C(20)-H(20B) | 0.9700   |
| C(9)-H(9C)   | 0.9600     | C(21)-H(21A) | 0.9600   |
| C(10)-H(10A) | 0.9600     | C(21)-H(21B) | 0.9600   |
| C(21)-H(21C) | 0.9600     |              |          |

|                  |            |                     |            |
|------------------|------------|---------------------|------------|
| C(1)-Pd(1)-P(1)  | 80.26(6)   | C(5)-C(4)-H(4)      | 119.3      |
| C(1)-Pd(1)-N(1)  | 81.09(8)   | C(3)-C(4)-H(4)      | 119.3      |
| P(1)-Pd(1)-N(1)  | 161.30(5)  | C(4)-C(5)-C(6)      | 120.2(2)   |
| C(1)-Pd(1)-Cl(1) | 176.84(6)  | C(4)-C(5)-H(5)      | 119.9      |
| P(1)-Pd(1)-Cl(1) | 97.42(2)   | C(6)-C(5)-H(5)      | 119.9      |
| N(1)-Pd(1)-Cl(1) | 101.27(5)  | C(1)-C(6)-C(5)      | 118.8(2)   |
| N(3)-P(1)-O(1)   | 105.48(9)  | C(1)-C(6)-C(7)      | 117.27(19) |
| N(3)-P(1)-N(2)   | 105.96(10) | C(5)-C(6)-C(7)      | 123.9(2)   |
| O(1)-P(1)-N(2)   | 97.93(10)  | C(6)-C(7)-N(1)      | 111.96(17) |
| N(3)-P(1)-Pd(1)  | 115.53(8)  | C(6)-C(7)-H(7A)     | 109.2      |
| O(1)-P(1)-Pd(1)  | 105.99(6)  | N(1)-C(7)-H(7A)     | 109.2      |
| N(2)-P(1)-Pd(1)  | 123.19(7)  | C(6)-C(7)-H(7B)     | 109.2      |
| C(2)-O(1)-P(1)   | 111.76(13) | N(1)-C(7)-H(7B)     | 109.2      |
| C(11)-N(1)-C(7)  | 110.19(17) | H(7A)-C(7)-H(7B)    | 107.9      |
| C(11)-N(1)-C(8)  | 110.63(17) | N(1)-C(8)-C(9)      | 111.93(19) |
| C(7)-N(1)-C(8)   | 109.08(17) | N(1)-C(8)-C(10)     | 112.35(19) |
| C(11)-N(1)-Pd(1) | 109.60(12) | C(9)-C(8)-C(10)     | 109.1(2)   |
| C(7)-N(1)-Pd(1)  | 106.46(12) | N(1)-C(8)-H(8)      | 107.8      |
| C(8)-N(1)-Pd(1)  | 110.80(13) | C(9)-C(8)-H(8)      | 107.8      |
| C(16)-N(2)-C(14) | 115.6(2)   | C(10)-C(8)-H(8)     | 107.8      |
| C(16)-N(2)-P(1)  | 120.44(19) | C(8)-C(9)-H(9A)     | 109.5      |
| C(14)-N(2)-P(1)  | 117.77(17) | C(8)-C(9)-H(9B)     | 109.5      |
| C(20)-N(3)-C(18) | 116.7(2)   | H(9A)-C(9)-H(9B)    | 109.5      |
| C(20)-N(3)-P(1)  | 122.64(16) | C(8)-C(9)-H(9C)     | 109.5      |
| C(18)-N(3)-P(1)  | 119.76(18) | H(9A)-C(9)-H(9C)    | 109.5      |
| C(2)-C(1)-C(6)   | 119.85(19) | H(9B)-C(9)-H(9C)    | 109.5      |
| C(2)-C(1)-Pd(1)  | 121.77(15) | C(8)-C(10)-H(10A)   | 109.5      |
| C(6)-C(1)-Pd(1)  | 118.37(16) | C(8)-C(10)-H(10B)   | 109.5      |
| C(1)-C(2)-C(3)   | 122.2(2)   | H(10A)-C(10)-H(10B) | 109.5      |
| C(1)-C(2)-O(1)   | 117.64(18) | C(8)-C(10)-H(10C)   | 109.5      |
| C(3)-C(2)-O(1)   | 120.2(2)   | H(10A)-C(10)-H(10C) | 109.5      |
| C(2)-C(3)-C(4)   | 117.6(2)   | H(10B)-C(10)-H(10C) | 109.5      |
| C(2)-C(3)-H(3)   | 121.2      | N(1)-C(11)-C(12)    | 111.38(19) |
| C(4)-C(3)-H(3)   | 121.2      | N(1)-C(11)-C(13)    | 113.8(2)   |
| C(5)-C(4)-C(3)   | 121.4(2)   | C(12)-C(11)-C(13)   | 110.8(2)   |

|                     |          |                     |          |
|---------------------|----------|---------------------|----------|
| N(1)-C(11)-H(11)    | 106.8    | H(17A)-C(17)-H(17B) | 109.5    |
| C(12)-C(11)-H(11)   | 106.8    | C(16)-C(17)-H(17C)  | 109.5    |
| C(13)-C(11)-H(11)   | 106.8    | H(17A)-C(17)-H(17C) | 109.5    |
| C(11)-C(12)-H(12A)  | 109.5    | H(17B)-C(17)-H(17C) | 109.5    |
| C(11)-C(12)-H(12B)  | 109.5    | N(3)-C(18)-C(19)    | 113.7(2) |
| H(12A)-C(12)-H(12B) | 109.5    | N(3)-C(18)-H(18A)   | 108.8    |
| C(11)-C(12)-H(12C)  | 109.5    | C(19)-C(18)-H(18A)  | 108.8    |
| H(12A)-C(12)-H(12C) | 109.5    | N(3)-C(18)-H(18B)   | 108.8    |
| H(12B)-C(12)-H(12C) | 109.5    | C(19)-C(18)-H(18B)  | 108.8    |
| C(11)-C(13)-H(13A)  | 109.5    | H(18A)-C(18)-H(18B) | 107.7    |
| C(11)-C(13)-H(13B)  | 109.5    | C(18)-C(19)-H(19A)  | 109.5    |
| H(13A)-C(13)-H(13B) | 109.5    | C(18)-C(19)-H(19B)  | 109.5    |
| C(11)-C(13)-H(13C)  | 109.5    | H(19A)-C(19)-H(19B) | 109.5    |
| H(13A)-C(13)-H(13C) | 109.5    | C(18)-C(19)-H(19C)  | 109.5    |
| H(13B)-C(13)-H(13C) | 109.5    | H(19A)-C(19)-H(19C) | 109.5    |
| N(2)-C(14)-C(15)    | 115.2(3) | H(19B)-C(19)-H(19C) | 109.5    |
| N(2)-C(14)-H(14A)   | 108.5    | N(3)-C(20)-C(21)    | 113.6(3) |
| C(15)-C(14)-H(14A)  | 108.5    | N(3)-C(20)-H(20A)   | 108.8    |
| N(2)-C(14)-H(14B)   | 108.5    | C(21)-C(20)-H(20A)  | 108.8    |
| C(15)-C(14)-H(14B)  | 108.5    | N(3)-C(20)-H(20B)   | 108.8    |
| H(14A)-C(14)-H(14B) | 107.5    | C(21)-C(20)-H(20B)  | 108.8    |
| C(14)-C(15)-H(15A)  | 109.5    | H(20A)-C(20)-H(20B) | 107.7    |
| C(14)-C(15)-H(15B)  | 109.5    | C(20)-C(21)-H(21A)  | 109.5    |
| H(15A)-C(15)-H(15B) | 109.5    | C(20)-C(21)-H(21B)  | 109.5    |
| C(14)-C(15)-H(15C)  | 109.5    | H(21A)-C(21)-H(21B) | 109.5    |
| H(15A)-C(15)-H(15C) | 109.5    | C(20)-C(21)-H(21C)  | 109.5    |
| H(15B)-C(15)-H(15C) | 109.5    | H(21A)-C(21)-H(21C) | 109.5    |
| N(2)-C(16)-C(17)    | 112.9(3) | H(21B)-C(21)-H(21C) | 109.5    |
| N(2)-C(16)-H(16A)   | 109.0    |                     |          |
| C(17)-C(16)-H(16A)  | 109.0    |                     |          |
| N(2)-C(16)-H(16B)   | 109.0    |                     |          |
| C(17)-C(16)-H(16B)  | 109.0    |                     |          |
| H(16A)-C(16)-H(16B) | 107.8    |                     |          |
| C(16)-C(17)-H(17A)  | 109.5    |                     |          |
| C(16)-C(17)-H(17B)  | 109.5    |                     |          |

Bond lengths [ $\text{\AA}$ ] and bond angles [ $^\circ$ ] for **3a**

|              |           |              |          |
|--------------|-----------|--------------|----------|
| Pd(1)-C(1)   | 1.952(3)  | C(11)-C(12)  | 1.514(5) |
| Pd(1)-O(2)   | 2.084(2)  | C(11)-C(13)  | 1.525(4) |
| Pd(1)-N(1)   | 2.207(2)  | C(11)-H(11)  | 0.9800   |
| Pd(1)-P(1)   | 2.2136(8) | C(12)-H(12A) | 0.9600   |
| P(1)-O(1)    | 1.696(2)  | C(12)-H(12B) | 0.9600   |
| P(1)-C(14)   | 1.811(3)  | C(12)-H(12C) | 0.9600   |
| P(1)-C(20)   | 1.822(3)  | C(13)-H(13A) | 0.9600   |
| O(1)-C(2)    | 1.379(3)  | C(13)-H(13B) | 0.9600   |
| O(2)-C(26)   | 1.276(4)  | C(13)-H(13C) | 0.9600   |
| O(3)-C(26)   | 1.243(4)  | C(14)-C(19)  | 1.375(4) |
| N(1)-C(11)   | 1.501(4)  | C(14)-C(15)  | 1.381(4) |
| N(1)-C(8)    | 1.508(4)  | C(15)-C(16)  | 1.383(5) |
| N(1)-C(7)    | 1.523(4)  | C(15)-H(15)  | 0.9300   |
| C(1)-C(2)    | 1.383(4)  | C(16)-C(17)  | 1.368(5) |
| C(1)-C(6)    | 1.383(4)  | C(16)-H(16)  | 0.9300   |
| C(2)-C(3)    | 1.386(4)  | C(17)-C(18)  | 1.372(5) |
| C(3)-C(4)    | 1.372(4)  | C(17)-H(17)  | 0.9300   |
| C(3)-H(3)    | 0.9300    | C(18)-C(19)  | 1.381(5) |
| C(4)-C(5)    | 1.385(5)  | C(18)-H(18)  | 0.9300   |
| C(4)-H(4)    | 0.9300    | C(19)-H(19)  | 0.9300   |
| C(5)-C(6)    | 1.395(4)  | C(20)-C(21)  | 1.379(4) |
| C(5)-H(5)    | 0.9300    | C(20)-C(25)  | 1.384(4) |
| C(6)-C(7)    | 1.506(4)  | C(21)-C(22)  | 1.374(5) |
| C(7)-H(7A)   | 0.9700    | C(21)-H(21)  | 0.9300   |
| C(7)-H(7B)   | 0.9700    | C(22)-C(23)  | 1.358(5) |
| C(8)-C(9)    | 1.513(5)  | C(22)-H(22)  | 0.9300   |
| C(8)-C(10)   | 1.525(5)  | C(23)-C(24)  | 1.376(5) |
| C(8)-H(8)    | 0.9800    | C(23)-H(23)  | 0.9300   |
| C(9)-H(9A)   | 0.9600    | C(24)-C(25)  | 1.377(5) |
| C(9)-H(9B)   | 0.9600    | C(24)-H(24)  | 0.9300   |
| C(9)-H(9C)   | 0.9600    | C(25)-H(25)  | 0.9300   |
| C(10)-H(10A) | 0.9600    | C(26)-C(27)  | 1.511(4) |
| C(10)-H(10B) | 0.9600    | C(27)-H(27A) | 0.9600   |
| C(10)-H(10C) | 0.9600    | C(27)-H(27B) | 0.9600   |
| C(27)-H(27C) | 0.9600    |              |          |

|                  |            |                     |          |
|------------------|------------|---------------------|----------|
| C(1)-Pd(1)-O(2)  | 175.64(10) | C(1)-C(6)-C(5)      | 118.8(3) |
| C(1)-Pd(1)-N(1)  | 82.44(10)  | C(1)-C(6)-C(7)      | 117.8(3) |
| O(2)-Pd(1)-N(1)  | 93.34(9)   | C(5)-C(6)-C(7)      | 123.3(3) |
| C(1)-Pd(1)-P(1)  | 81.21(8)   | C(6)-C(7)-N(1)      | 111.9(2) |
| O(2)-Pd(1)-P(1)  | 102.90(6)  | C(6)-C(7)-H(7A)     | 109.2    |
| N(1)-Pd(1)-P(1)  | 162.89(6)  | N(1)-C(7)-H(7A)     | 109.2    |
| O(1)-P(1)-C(14)  | 98.16(12)  | C(6)-C(7)-H(7B)     | 109.2    |
| O(1)-P(1)-C(20)  | 98.45(12)  | N(1)-C(7)-H(7B)     | 109.2    |
| C(14)-P(1)-C(20) | 106.47(13) | H(7A)-C(7)-H(7B)    | 107.9    |
| O(1)-P(1)-Pd(1)  | 103.56(7)  | N(1)-C(8)-C(9)      | 111.0(3) |
| C(14)-P(1)-Pd(1) | 127.00(10) | N(1)-C(8)-C(10)     | 111.4(3) |
| C(20)-P(1)-Pd(1) | 117.06(10) | C(9)-C(8)-C(10)     | 109.9(3) |
| C(2)-O(1)-P(1)   | 112.65(16) | N(1)-C(8)-H(8)      | 108.1    |
| C(26)-O(2)-Pd(1) | 119.61(19) | C(9)-C(8)-H(8)      | 108.1    |
| C(11)-N(1)-C(8)  | 112.9(2)   | C(10)-C(8)-H(8)     | 108.1    |
| C(11)-N(1)-C(7)  | 109.7(2)   | C(8)-C(9)-H(9A)     | 109.5    |
| C(8)-N(1)-C(7)   | 107.2(2)   | C(8)-C(9)-H(9B)     | 109.5    |
| C(11)-N(1)-Pd(1) | 106.88(18) | H(9A)-C(9)-H(9B)    | 109.5    |
| C(8)-N(1)-Pd(1)  | 112.90(17) | C(8)-C(9)-H(9C)     | 109.5    |
| C(7)-N(1)-Pd(1)  | 107.12(16) | H(9A)-C(9)-H(9C)    | 109.5    |
| C(2)-C(1)-C(6)   | 120.1(3)   | H(9B)-C(9)-H(9C)    | 109.5    |
| C(2)-C(1)-Pd(1)  | 121.9(2)   | C(8)-C(10)-H(10A)   | 109.5    |
| C(6)-C(1)-Pd(1)  | 118.0(2)   | C(8)-C(10)-H(10B)   | 109.5    |
| C(1)-C(2)-O(1)   | 117.8(2)   | H(10A)-C(10)-H(10B) | 109.5    |
| C(1)-C(2)-C(3)   | 121.6(3)   | C(8)-C(10)-H(10C)   | 109.5    |
| O(1)-C(2)-C(3)   | 120.6(3)   | H(10A)-C(10)-H(10C) | 109.5    |
| C(4)-C(3)-C(2)   | 117.8(3)   | H(10B)-C(10)-H(10C) | 109.5    |
| C(4)-C(3)-H(3)   | 121.1      | N(1)-C(11)-C(12)    | 112.1(3) |
| C(2)-C(3)-H(3)   | 121.1      | N(1)-C(11)-C(13)    | 114.1(3) |
| C(3)-C(4)-C(5)   | 121.9(3)   | C(12)-C(11)-C(13)   | 110.5(3) |
| C(3)-C(4)-H(4)   | 119.1      | N(1)-C(11)-H(11)    | 106.5    |
| C(5)-C(4)-H(4)   | 119.1      | C(12)-C(11)-H(11)   | 106.5    |
| C(4)-C(5)-C(6)   | 119.8(3)   | C(13)-C(11)-H(11)   | 106.5    |
| C(4)-C(5)-H(5)   | 120.1      | C(11)-C(12)-H(12A)  | 109.5    |
| C(6)-C(5)-H(5)   | 120.1      | C(11)-C(12)-H(12B)  | 109.5    |

|                     |          |                     |          |
|---------------------|----------|---------------------|----------|
| H(12A)-C(12)-H(12B) | 109.5    | C(23)-C(22)-H(22)   | 119.9    |
| C(11)-C(12)-H(12C)  | 109.5    | C(21)-C(22)-H(22)   | 119.9    |
| H(12A)-C(12)-H(12C) | 109.5    | C(22)-C(23)-C(24)   | 119.9(3) |
| H(12B)-C(12)-H(12C) | 109.5    | C(22)-C(23)-H(23)   | 120.1    |
| C(11)-C(13)-H(13A)  | 109.5    | C(24)-C(23)-H(23)   | 120.1    |
| C(11)-C(13)-H(13B)  | 109.5    | C(25)-C(24)-C(23)   | 120.3(3) |
| H(13A)-C(13)-H(13B) | 109.5    | C(25)-C(24)-H(24)   | 119.8    |
| C(11)-C(13)-H(13C)  | 109.5    | C(23)-C(24)-H(24)   | 119.8    |
| H(13A)-C(13)-H(13C) | 109.5    | C(24)-C(25)-C(20)   | 120.1(3) |
| H(13B)-C(13)-H(13C) | 109.5    | C(24)-C(25)-H(25)   | 120.0    |
| C(19)-C(14)-C(15)   | 119.4(3) | C(20)-C(25)-H(25)   | 120.0    |
| C(19)-C(14)-P(1)    | 121.4(2) | O(3)-C(26)-O(2)     | 125.0(3) |
| C(15)-C(14)-P(1)    | 119.0(2) | O(3)-C(26)-C(27)    | 120.6(3) |
| C(16)-C(15)-C(14)   | 120.3(3) | O(2)-C(26)-C(27)    | 114.3(3) |
| C(16)-C(15)-H(15)   | 119.8    | C(26)-C(27)-H(27A)  | 109.5    |
| C(14)-C(15)-H(15)   | 119.8    | C(26)-C(27)-H(27B)  | 109.5    |
| C(17)-C(16)-C(15)   | 119.9(3) | H(27A)-C(27)-H(27B) | 109.5    |
| C(17)-C(16)-H(16)   | 120.1    | C(26)-C(27)-H(27C)  | 109.5    |
| C(15)-C(16)-H(16)   | 120.1    | H(27A)-C(27)-H(27C) | 109.5    |
| C(18)-C(17)-C(16)   | 120.0(3) | H(27B)-C(27)-H(27C) | 109.5    |
| C(18)-C(17)-H(17)   | 120.0    |                     |          |
| C(16)-C(17)-H(17)   | 120.0    |                     |          |
| C(17)-C(18)-C(19)   | 120.3(3) |                     |          |
| C(17)-C(18)-H(18)   | 119.8    |                     |          |
| C(19)-C(18)-H(18)   | 119.8    |                     |          |
| C(14)-C(19)-C(18)   | 120.0(3) |                     |          |
| C(14)-C(19)-H(19)   | 120.0    |                     |          |
| C(18)-C(19)-H(19)   | 120.0    |                     |          |
| C(21)-C(20)-C(25)   | 118.6(3) |                     |          |
| C(21)-C(20)-P(1)    | 117.0(2) |                     |          |
| C(25)-C(20)-P(1)    | 124.4(2) |                     |          |
| C(22)-C(21)-C(20)   | 121.0(3) |                     |          |
| C(22)-C(21)-H(21)   | 119.5    |                     |          |
| C(20)-C(21)-H(21)   | 119.5    |                     |          |
| C(23)-C(22)-C(21)   | 120.1(3) |                     |          |



Bond lengths [ $\text{\AA}$ ] and bond angles [ $^\circ$ ] for **3b**

|              |            |              |          |
|--------------|------------|--------------|----------|
| Pd(1)-C(1)   | 1.9510(17) | C(9)-H(9C)   | 0.9600   |
| Pd(1)-O(2)   | 2.1247(12) | C(10)-H(10A) | 0.9600   |
| Pd(1)-P(1)   | 2.2140(5)  | C(10)-H(10B) | 0.9600   |
| Pd(1)-N(1)   | 2.2295(14) | C(10)-H(10C) | 0.9600   |
| P(1)-N(3)    | 1.6387(14) | C(11)-C(13)  | 1.523(3) |
| P(1)-O(1)    | 1.6613(12) | C(11)-C(12)  | 1.529(3) |
| P(1)-N(2)    | 1.6691(14) | C(11)-H(11)  | 0.9800   |
| O(1)-C(6)    | 1.395(2)   | C(12)-H(12A) | 0.9600   |
| O(2)-C(22)   | 1.263(2)   | C(12)-H(12B) | 0.9600   |
| O(3)-C(22)   | 1.238(2)   | C(12)-H(12C) | 0.9600   |
| N(1)-C(7)    | 1.511(2)   | C(13)-H(13A) | 0.9600   |
| N(1)-C(8)    | 1.518(2)   | C(13)-H(13B) | 0.9600   |
| N(1)-C(11)   | 1.517(2)   | C(13)-H(13C) | 0.9600   |
| N(2)-C(16)   | 1.474(2)   | C(14)-C(15)  | 1.516(3) |
| N(2)-C(14)   | 1.475(2)   | C(14)-H(14A) | 0.9700   |
| N(3)-C(18)   | 1.475(2)   | C(14)-H(14B) | 0.9700   |
| N(3)-C(20)   | 1.474(2)   | C(15)-H(15A) | 0.9600   |
| C(1)-C(6)    | 1.390(3)   | C(15)-H(15B) | 0.9600   |
| C(1)-C(2)    | 1.391(3)   | C(15)-H(15C) | 0.9600   |
| C(2)-C(3)    | 1.397(3)   | C(16)-C(17)  | 1.512(3) |
| C(2)-C(7)    | 1.503(3)   | C(16)-H(16A) | 0.9700   |
| C(3)-C(4)    | 1.388(3)   | C(16)-H(16B) | 0.9700   |
| C(3)-H(3)    | 0.9300     | C(17)-H(17A) | 0.9600   |
| C(4)-C(5)    | 1.395(3)   | C(17)-H(17B) | 0.9600   |
| C(4)-H(4)    | 0.9300     | C(17)-H(17C) | 0.9600   |
| C(5)-C(6)    | 1.384(3)   | C(18)-C(19)  | 1.520(3) |
| C(5)-H(5)    | 0.9300     | C(18)-H(18A) | 0.9700   |
| C(7)-H(7A)   | 0.9700     | C(18)-H(18B) | 0.9700   |
| C(7)-H(7B)   | 0.9700     | C(19)-H(19A) | 0.9600   |
| C(8)-C(9)    | 1.522(3)   | C(19)-H(19B) | 0.9600   |
| C(8)-C(10)   | 1.521(3)   | C(19)-H(19C) | 0.9600   |
| C(8)-H(8)    | 0.9800     | C(20)-C(21)  | 1.510(3) |
| C(9)-H(9A)   | 0.9600     | C(20)-H(20A) | 0.9700   |
| C(9)-H(9B)   | 0.9600     | C(20)-H(20B) | 0.9700   |
| C(21)-H(21A) | 0.9600     | C(23)-H(23A) | 0.9600   |

|              |          |              |        |
|--------------|----------|--------------|--------|
| C(21)-H(21B) | 0.9600   | C(23)-H(23B) | 0.9600 |
| C(21)-H(21C) | 0.9600   | C(23)-H(23C) | 0.9600 |
| C(22)-C(23)  | 1.513(3) |              |        |

---

|                  |            |                  |            |
|------------------|------------|------------------|------------|
| C(1)-Pd(1)-O(2)  | 170.84(6)  | C(1)-C(2)-C(3)   | 119.68(17) |
| C(1)-Pd(1)-P(1)  | 80.77(6)   | C(1)-C(2)-C(7)   | 117.33(15) |
| O(2)-Pd(1)-P(1)  | 102.48(4)  | C(3)-C(2)-C(7)   | 122.87(16) |
| C(1)-Pd(1)-N(1)  | 81.97(7)   | C(4)-C(3)-C(2)   | 119.97(17) |
| O(2)-Pd(1)-N(1)  | 95.14(5)   | C(4)-C(3)-H(3)   | 120.0      |
| P(1)-Pd(1)-N(1)  | 162.35(4)  | C(2)-C(3)-H(3)   | 120.0      |
| N(3)-P(1)-O(1)   | 107.60(7)  | C(3)-C(4)-C(5)   | 121.10(17) |
| N(3)-P(1)-N(2)   | 103.51(8)  | C(3)-C(4)-H(4)   | 119.4      |
| O(1)-P(1)-N(2)   | 97.84(7)   | C(5)-C(4)-H(4)   | 119.4      |
| N(3)-P(1)-Pd(1)  | 115.69(5)  | C(6)-C(5)-C(4)   | 117.84(17) |
| O(1)-P(1)-Pd(1)  | 105.89(5)  | C(6)-C(5)-H(5)   | 121.1      |
| N(2)-P(1)-Pd(1)  | 124.03(6)  | C(4)-C(5)-H(5)   | 121.1      |
| C(6)-O(1)-P(1)   | 113.07(11) | C(5)-C(6)-C(1)   | 122.29(17) |
| C(22)-O(2)-Pd(1) | 117.78(12) | C(5)-C(6)-O(1)   | 120.23(16) |
| C(7)-N(1)-C(8)   | 108.40(13) | C(1)-C(6)-O(1)   | 117.48(15) |
| C(7)-N(1)-C(11)  | 110.12(13) | C(2)-C(7)-N(1)   | 112.61(14) |
| C(8)-N(1)-C(11)  | 111.48(13) | C(2)-C(7)-H(7A)  | 109.1      |
| C(7)-N(1)-Pd(1)  | 106.61(10) | N(1)-C(7)-H(7A)  | 109.1      |
| C(8)-N(1)-Pd(1)  | 110.85(10) | C(2)-C(7)-H(7B)  | 109.1      |
| C(11)-N(1)-Pd(1) | 109.26(10) | N(1)-C(7)-H(7B)  | 109.1      |
| C(16)-N(2)-C(14) | 114.83(14) | H(7A)-C(7)-H(7B) | 107.8      |
| C(16)-N(2)-P(1)  | 118.32(11) | C(9)-C(8)-N(1)   | 110.83(15) |
| C(14)-N(2)-P(1)  | 118.76(12) | C(9)-C(8)-C(10)  | 109.52(17) |
| C(18)-N(3)-C(20) | 116.10(14) | N(1)-C(8)-C(10)  | 113.49(15) |
| C(18)-N(3)-P(1)  | 121.72(12) | C(9)-C(8)-H(8)   | 107.6      |
| C(20)-N(3)-P(1)  | 119.80(11) | N(1)-C(8)-H(8)   | 107.6      |
| C(6)-C(1)-C(2)   | 119.11(16) | C(10)-C(8)-H(8)  | 107.6      |
| C(6)-C(1)-Pd(1)  | 122.56(13) | C(8)-C(9)-H(9A)  | 109.5      |
| C(2)-C(1)-Pd(1)  | 118.28(13) | C(8)-C(9)-H(9B)  | 109.5      |

|                     |            |                     |            |
|---------------------|------------|---------------------|------------|
| H(9A)-C(9)-H(9B)    | 109.5      | C(14)-C(15)-H(15B)  | 109.5      |
| C(8)-C(9)-H(9C)     | 109.5      | H(15A)-C(15)-H(15B) | 109.5      |
| H(9A)-C(9)-H(9C)    | 109.5      | C(14)-C(15)-H(15C)  | 109.5      |
| H(9B)-C(9)-H(9C)    | 109.5      | H(15A)-C(15)-H(15C) | 109.5      |
| C(8)-C(10)-H(10A)   | 109.5      | H(15B)-C(15)-H(15C) | 109.5      |
| C(8)-C(10)-H(10B)   | 109.5      | N(2)-C(16)-C(17)    | 112.45(16) |
| H(10A)-C(10)-H(10B) | 109.5      | N(2)-C(16)-H(16A)   | 109.1      |
| C(8)-C(10)-H(10C)   | 109.5      | C(17)-C(16)-H(16A)  | 109.1      |
| H(10A)-C(10)-H(10C) | 109.5      | N(2)-C(16)-H(16B)   | 109.1      |
| H(10B)-C(10)-H(10C) | 109.5      | C(17)-C(16)-H(16B)  | 109.1      |
| N(1)-C(11)-C(13)    | 111.39(14) | H(16A)-C(16)-H(16B) | 107.8      |
| N(1)-C(11)-C(12)    | 113.96(15) | C(16)-C(17)-H(17A)  | 109.5      |
| C(13)-C(11)-C(12)   | 110.44(16) | C(16)-C(17)-H(17B)  | 109.5      |
| N(1)-C(11)-H(11)    | 106.9      | H(17A)-C(17)-H(17B) | 109.5      |
| C(13)-C(11)-H(11)   | 106.9      | C(16)-C(17)-H(17C)  | 109.5      |
| C(12)-C(11)-H(11)   | 106.9      | H(17A)-C(17)-H(17C) | 109.5      |
| C(11)-C(12)-H(12A)  | 109.5      | H(17B)-C(17)-H(17C) | 109.5      |
| C(11)-C(12)-H(12B)  | 109.5      | N(3)-C(18)-C(19)    | 113.26(17) |
| H(12A)-C(12)-H(12B) | 109.5      | N(3)-C(18)-H(18A)   | 108.9      |
| C(11)-C(12)-H(12C)  | 109.5      | C(19)-C(18)-H(18A)  | 108.9      |
| H(12A)-C(12)-H(12C) | 109.5      | N(3)-C(18)-H(18B)   | 108.9      |
| H(12B)-C(12)-H(12C) | 109.5      | C(19)-C(18)-H(18B)  | 108.9      |
| C(11)-C(13)-H(13A)  | 109.5      | H(18A)-C(18)-H(18B) | 107.7      |
| C(11)-C(13)-H(13B)  | 109.5      | C(18)-C(19)-H(19A)  | 109.5      |
| H(13A)-C(13)-H(13B) | 109.5      | C(18)-C(19)-H(19B)  | 109.5      |
| C(11)-C(13)-H(13C)  | 109.5      | H(19A)-C(19)-H(19B) | 109.5      |
| H(13A)-C(13)-H(13C) | 109.5      | C(18)-C(19)-H(19C)  | 109.5      |
| H(13B)-C(13)-H(13C) | 109.5      | H(19A)-C(19)-H(19C) | 109.5      |
| N(2)-C(14)-C(15)    | 115.21(17) | H(19B)-C(19)-H(19C) | 109.5      |
| N(2)-C(14)-H(14A)   | 108.5      | N(3)-C(20)-C(21)    | 113.76(16) |
| C(15)-C(14)-H(14A)  | 108.5      | N(3)-C(20)-H(20A)   | 108.8      |
| N(2)-C(14)-H(14B)   | 108.5      | C(21)-C(20)-H(20A)  | 108.8      |
| C(15)-C(14)-H(14B)  | 108.5      | N(3)-C(20)-H(20B)   | 108.8      |
| H(14A)-C(14)-H(14B) | 107.5      | C(21)-C(20)-H(20B)  | 108.8      |
| C(14)-C(15)-H(15A)  | 109.5      | H(20A)-C(20)-H(20B) | 107.7      |
| C(20)-C(21)-H(21A)  | 109.5      | O(2)-C(22)-C(23)    | 116.41(18) |

|                     |            |                     |       |
|---------------------|------------|---------------------|-------|
| C(20)-C(21)-H(21B)  | 109.5      | C(22)-C(23)-H(23A)  | 109.5 |
| H(21A)-C(21)-H(21B) | 109.5      | C(22)-C(23)-H(23B)  | 109.5 |
| C(20)-C(21)-H(21C)  | 109.5      | H(23A)-C(23)-H(23B) | 109.5 |
| H(21A)-C(21)-H(21C) | 109.5      | C(22)-C(23)-H(23C)  | 109.5 |
| H(21B)-C(21)-H(21C) | 109.5      | H(23A)-C(23)-H(23C) | 109.5 |
| O(3)-C(22)-O(2)     | 124.74(18) | H(23B)-C(23)-H(23C) | 109.5 |
| O(3)-C(22)-C(23)    | 118.80(18) |                     |       |

---

Symmetry transformations used to generate equivalent atoms:

Bond lengths [Å] and bond angles [°] for **5a**

|              |            |              |           |
|--------------|------------|--------------|-----------|
| Pd(1)-C(1)   | 2.002(4)   | C(9)-H(9C)   | 0.9600    |
| Pd(1)-O(2)   | 2.093(3)   | C(10)-H(10A) | 0.9600    |
| Pd(1)-O(3)   | 2.139(3)   | C(10)-H(10B) | 0.9600    |
| Pd(1)-P(1)   | 2.1730(12) | C(10)-H(10C) | 0.9600    |
| P(1)-O(1)    | 1.620(3)   | C(11)-C(12)  | 1.490(12) |
| P(1)-C(14)   | 1.790(5)   | C(11)-C(13)  | 1.549(12) |
| P(1)-C(20)   | 1.803(5)   | C(11)-H(11)  | 0.9800    |
| O(1)-C(6)    | 1.414(5)   | C(12)-H(12A) | 0.9600    |
| O(2)-C(26)   | 1.253(5)   | C(12)-H(12B) | 0.9600    |
| O(3)-C(26)#1 | 1.249(5)   | C(12)-H(12C) | 0.9600    |
| N(1)-C(7)    | 1.456(6)   | C(13)-H(13A) | 0.9600    |
| N(1)-C(11)   | 1.456(7)   | C(13)-H(13B) | 0.9600    |
| N(1)-C(8)    | 1.464(6)   | C(13)-H(13C) | 0.9600    |
| C(1)-C(6)    | 1.394(6)   | C(14)-C(19)  | 1.342(7)  |
| C(1)-C(2)    | 1.388(6)   | C(14)-C(15)  | 1.366(6)  |
| C(2)-C(3)    | 1.392(6)   | C(15)-C(16)  | 1.382(7)  |
| C(2)-H(2)    | 0.9300     | C(15)-H(15)  | 0.9300    |
| C(3)-C(4)    | 1.376(6)   | C(16)-C(17)  | 1.332(7)  |
| C(3)-H(3)    | 0.9300     | C(16)-H(16)  | 0.9300    |
| C(4)-C(5)    | 1.387(6)   | C(17)-C(18)  | 1.335(7)  |
| C(4)-C(7)    | 1.509(6)   | C(17)-H(17)  | 0.9300    |
| C(5)-C(6)    | 1.375(6)   | C(18)-C(19)  | 1.386(8)  |
| C(5)-H(5)    | 0.9300     | C(18)-H(18)  | 0.9300    |
| C(7)-H(7A)   | 0.9700     | C(19)-H(19)  | 0.9300    |
| C(7)-H(7B)   | 0.9700     | C(20)-C(21)  | 1.361(7)  |
| C(8)-C(10)   | 1.515(9)   | C(20)-C(25)  | 1.364(7)  |
| C(8)-C(9)    | 1.522(8)   | C(21)-C(22)  | 1.379(7)  |
| C(8)-H(8)    | 0.9800     | C(21)-H(21)  | 0.9300    |
| C(9)-H(9A)   | 0.9600     | C(22)-C(23)  | 1.354(10) |
| C(9)-H(9B)   | 0.9600     | C(22)-H(22)  | 0.9300    |
| C(23)-C(24)  | 1.330(10)  | C(26)-O(3)#1 | 1.249(5)  |
| C(23)-H(23)  | 0.9300     | C(26)-C(27)  | 1.518(6)  |
| C(24)-C(25)  | 1.387(8)   | C(27)-H(27A) | 0.9600    |
| C(24)-H(24)  | 0.9300     | C(27)-H(27B) | 0.9600    |
| C(25)-H(25)  | 0.9300     | C(27)-H(27C) | 0.9600    |

|                     |            |                   |          |
|---------------------|------------|-------------------|----------|
| C(1)-Pd(1)-O(2)     | 92.23(15)  | C(3)-C(4)-C(5)    | 118.3(4) |
| C(1)-Pd(1)-O(3)     | 171.83(14) | C(3)-C(4)-C(7)    | 120.8(4) |
| O(2)-Pd(1)-O(3)     | 90.06(11)  | C(5)-C(4)-C(7)    | 120.8(5) |
| C(1)-Pd(1)-P(1)     | 79.51(12)  | C(6)-C(5)-C(4)    | 118.9(4) |
| O(2)-Pd(1)-P(1)     | 169.83(9)  | C(6)-C(5)-H(5)    | 120.6    |
| O(3)-Pd(1)-P(1)     | 97.33(9)   | C(4)-C(5)-H(5)    | 120.6    |
| O(1)-P(1)-C(14)     | 102.34(19) | C(5)-C(6)-C(1)    | 124.6(4) |
| O(1)-P(1)-C(20)     | 103.4(2)   | C(5)-C(6)-O(1)    | 117.8(4) |
| C(14)-P(1)-C(20)    | 105.6(2)   | C(1)-C(6)-O(1)    | 117.6(4) |
| O(1)-P(1)-Pd(1)     | 108.63(11) | N(1)-C(7)-C(4)    | 113.5(4) |
| C(14)-P(1)-Pd(1)    | 119.96(15) | N(1)-C(7)-H(7A)   | 108.9    |
| C(20)-P(1)-Pd(1)    | 115.02(16) | C(4)-C(7)-H(7A)   | 108.9    |
| C(6)-O(1)-P(1)      | 110.8(3)   | N(1)-C(7)-H(7B)   | 108.9    |
| C(26)-O(2)-Pd(1)    | 128.2(3)   | C(4)-C(7)-H(7B)   | 108.9    |
| C(26)#1-O(3)-Pd(1)  | 127.1(3)   | H(7A)-C(7)-H(7B)  | 107.7    |
| C(7)-N(1)-C(11)     | 114.7(4)   | N(1)-C(8)-C(10)   | 116.9(6) |
| C(7)-N(1)-C(8)      | 113.4(5)   | N(1)-C(8)-C(9)    | 110.8(5) |
| C(11)-N(1)-C(8)     | 115.7(5)   | C(10)-C(8)-C(9)   | 110.7(6) |
| C(6)-C(1)-C(2)      | 115.2(4)   | N(1)-C(8)-H(8)    | 105.8    |
| C(6)-C(1)-Pd(1)     | 120.3(3)   | C(10)-C(8)-H(8)   | 105.8    |
| C(2)-C(1)-Pd(1)     | 124.4(3)   | C(9)-C(8)-H(8)    | 105.8    |
| C(1)-C(2)-C(3)      | 121.1(4)   | C(8)-C(9)-H(9A)   | 109.5    |
| C(1)-C(2)-H(2)      | 119.4      | C(8)-C(9)-H(9B)   | 109.5    |
| C(3)-C(2)-H(2)      | 119.4      | H(9A)-C(9)-H(9B)  | 109.5    |
| C(4)-C(3)-C(2)      | 121.9(4)   | C(8)-C(9)-H(9C)   | 109.5    |
| C(4)-C(3)-H(3)      | 119.1      | H(9A)-C(9)-H(9C)  | 109.5    |
| C(2)-C(3)-H(3)      | 119.1      | H(9B)-C(9)-H(9C)  | 109.5    |
| C(8)-C(10)-H(10A)   | 109.5      | C(18)-C(17)-H(17) | 120.6    |
| C(8)-C(10)-H(10B)   | 109.5      | C(17)-C(18)-C(19) | 120.9(6) |
| H(10A)-C(10)-H(10B) | 109.5      | C(17)-C(18)-H(18) | 119.6    |
| C(8)-C(10)-H(10C)   | 109.5      | C(19)-C(18)-H(18) | 119.6    |
| H(10A)-C(10)-H(10C) | 109.5      | C(14)-C(19)-C(18) | 121.4(5) |
| H(10B)-C(10)-H(10C) | 109.5      | C(14)-C(19)-H(19) | 119.3    |
| N(1)-C(11)-C(12)    | 109.5(7)   | C(18)-C(19)-H(19) | 119.3    |
| N(1)-C(11)-C(13)    | 113.4(7)   | C(21)-C(20)-C(25) | 117.9(5) |
| C(12)-C(11)-C(13)   | 113.1(7)   | C(21)-C(20)-P(1)  | 119.4(4) |

|                     |          |                     |          |
|---------------------|----------|---------------------|----------|
| N(1)-C(11)-H(11)    | 106.8    | C(25)-C(20)-P(1)    | 122.7(4) |
| C(12)-C(11)-H(11)   | 106.8    | C(20)-C(21)-C(22)   | 120.7(6) |
| C(13)-C(11)-H(11)   | 106.8    | C(20)-C(21)-H(21)   | 119.7    |
| C(11)-C(12)-H(12A)  | 109.5    | C(22)-C(21)-H(21)   | 119.7    |
| C(11)-C(12)-H(12B)  | 109.5    | C(23)-C(22)-C(21)   | 119.7(7) |
| H(12A)-C(12)-H(12B) | 109.5    | C(23)-C(22)-H(22)   | 120.1    |
| C(11)-C(12)-H(12C)  | 109.5    | C(21)-C(22)-H(22)   | 120.1    |
| H(12A)-C(12)-H(12C) | 109.5    | C(24)-C(23)-C(22)   | 121.1(7) |
| H(12B)-C(12)-H(12C) | 109.5    | C(24)-C(23)-H(23)   | 119.5    |
| C(11)-C(13)-H(13A)  | 109.5    | C(22)-C(23)-H(23)   | 119.5    |
| C(11)-C(13)-H(13B)  | 109.5    | C(23)-C(24)-C(25)   | 119.2(7) |
| H(13A)-C(13)-H(13B) | 109.5    | C(23)-C(24)-H(24)   | 120.4    |
| C(11)-C(13)-H(13C)  | 109.5    | C(25)-C(24)-H(24)   | 120.4    |
| H(13A)-C(13)-H(13C) | 109.5    | C(20)-C(25)-C(24)   | 121.4(6) |
| H(13B)-C(13)-H(13C) | 109.5    | C(20)-C(25)-H(25)   | 119.3    |
| C(19)-C(14)-C(15)   | 116.9(5) | C(24)-C(25)-H(25)   | 119.3    |
| C(19)-C(14)-P(1)    | 120.2(4) | O(2)-C(26)-O(3)#1   | 126.7(4) |
| C(15)-C(14)-P(1)    | 123.0(4) | O(2)-C(26)-C(27)    | 115.4(4) |
| C(14)-C(15)-C(16)   | 121.2(5) | O(3)#1-C(26)-C(27)  | 117.8(4) |
| C(14)-C(15)-H(15)   | 119.4    | C(26)-C(27)-H(27A)  | 109.5    |
| C(16)-C(15)-H(15)   | 119.4    | C(26)-C(27)-H(27B)  | 109.5    |
| C(17)-C(16)-C(15)   | 120.9(5) | H(27A)-C(27)-H(27B) | 109.5    |
| C(17)-C(16)-H(16)   | 119.6    | C(26)-C(27)-H(27C)  | 109.5    |
| C(15)-C(16)-H(16)   | 119.6    | H(27A)-C(27)-H(27C) | 109.5    |
| C(16)-C(17)-C(18)   | 118.8(6) | H(27B)-C(27)-H(27C) | 109.5    |
| C(16)-C(17)-H(17)   | 120.6    |                     |          |
